# Supplementary material for: A Frontal Ablation Dataset for 49 Tidewater Glaciers in Greenland
Source: Copernicus journal article supplement (doi:10.5194/essd-2023-411), 2023-12-11
Supplement: Supplementary file 1 [file essd-2023-411-supplement.pdf]

# Supplementary Material

## Supplementary images and data

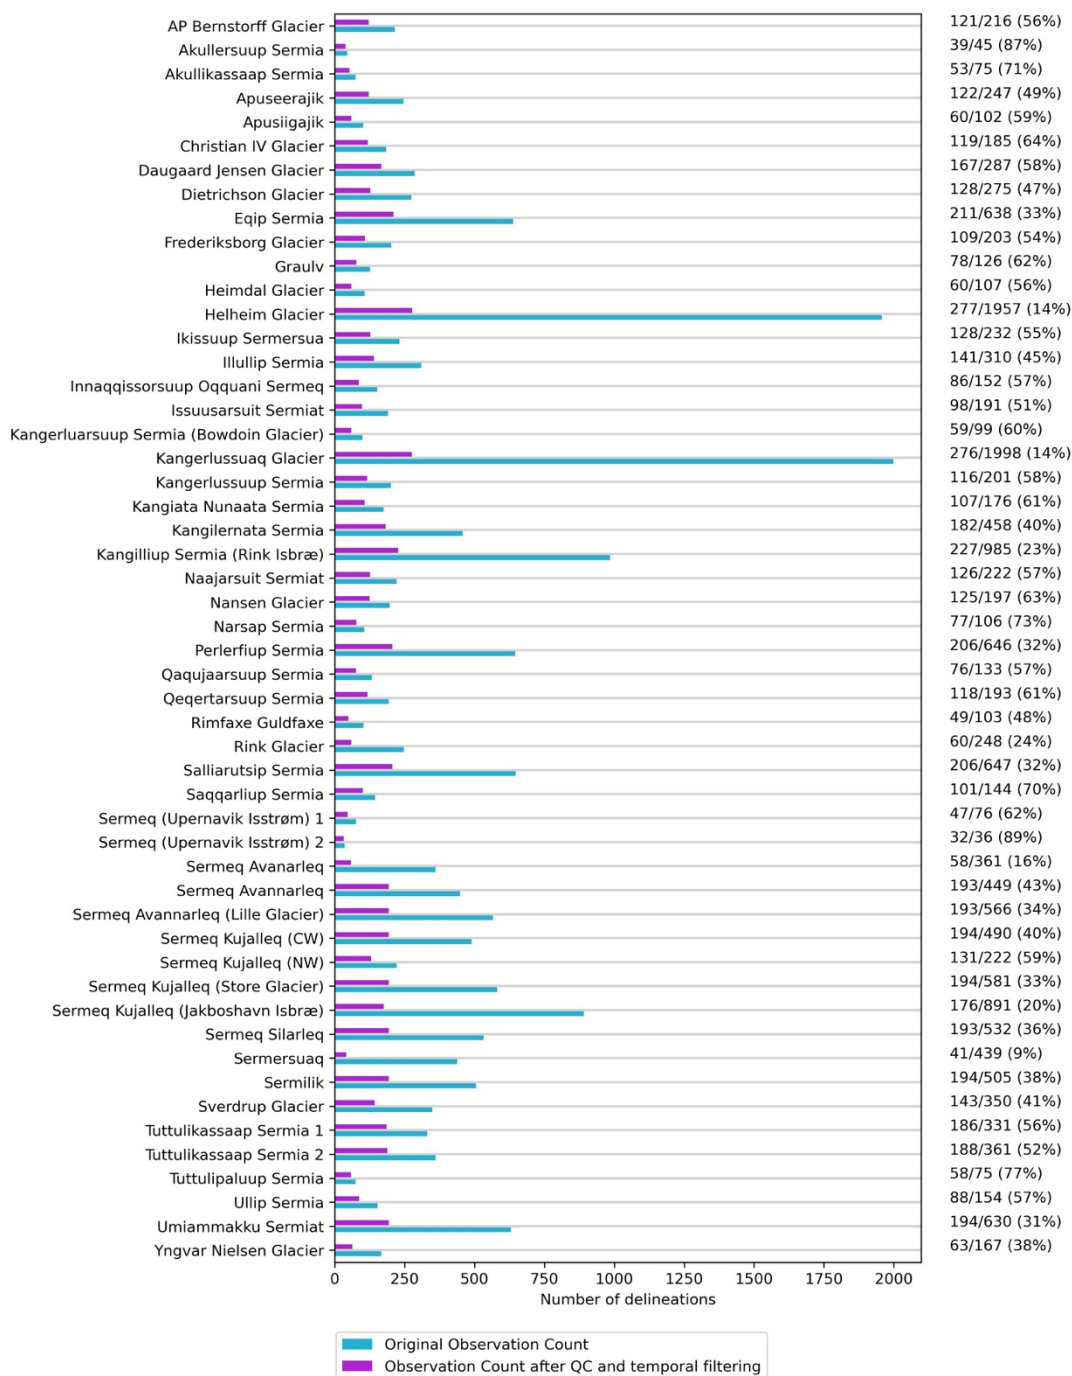

**Figure S 1 | Number of terminus delineations before and after filtering**

Overview of terminus delineations for each tidewater glacier before (blue) and after filtering (purple), with numbers indicating the number of filtered and all delineations, and the percentage of kept observations.

**Table S 1: Spatio-temporal resolutions and uncertainties of input datasets**

Spatial and temporal resolutions for each input dataset and uncertainties associated with them.

| Dataset             | Spatial resolution [m] | temporal resolution               | uncertainty +/- [m]                    |
|---------------------|------------------------|-----------------------------------|----------------------------------------|
| TermPicks           | 30<br>15               | 1908 -2020                        | Landsat 4/5: 5.6<br>Landsat 7/8: 3.6   |
| ArcticDEM           | 2                      | Glacier dependent                 | 0.1                                    |
| AeroDEM             | 25                     | Glacier dependent                 | 6                                      |
| BedMachine v4       | 150                    | 2017                              | See Table S1 for mean error            |
| Ice flux            | N/A                    | 1985-today (monthly to bi-weekly) | Taken from Mankoff et al. (2020)       |
| ITS_LIVE Velocities | 240                    | 1985-2019                         | Not need for processing (see raw data) |

**Table S 2 | Overview of location, mean bedrock topography error, and mean annual frontal ablation for each glacier.**

Name, region, and latitude/longitude shown for each glacier as well as mean bedrock topography errors extracted along the centerline from BedMachine v4 (Morlighem et al., 2017, 2021)), and annual frontal ablation estimates for each tidewater glacier for the period 1987 – 2018 (period where observations are available for all tidewater glaciers).

| Name                               | Region | Lat   | Lon    | Mean bedrock topography error (along centerline) [m] | Annual mean frontal ablation (1987-2018) [Gt/yr] |
|------------------------------------|--------|-------|--------|------------------------------------------------------|--------------------------------------------------|
| Akullersuup Sermia                 | SW     | 64.38 | -49.48 | 29.00                                                | 0.73                                             |
| Kangiata Nunaata Sermia            |        | 64.30 | -49.61 | 57.50                                                | 5.65                                             |
| Narsap Sermia                      |        | 64.67 | -49.86 | 45.22                                                | 2.16                                             |
| Eqip Sermia                        | CW     | 69.81 | -50.19 | 41.33                                                | 0.83                                             |
| Kangerlussuup Sermia               |        | 71.46 | -51.31 | 44.83                                                | 1.86                                             |
| Kangilernata Sermia                |        | 69.90 | -50.34 | 13.87                                                | 0.83                                             |
| Kangilliup Sermia (Rink Isbræ)     |        | 71.77 | -51.50 | 53.33                                                | 12.78                                            |
| Perlerfiup Sermia                  |        | 70.99 | -50.92 | 45.96                                                | 0.89                                             |
| Saqqarliup Sermia                  |        | 68.87 | -50.28 | 18.61                                                | 0.38                                             |
| Sermeq Avannarleq                  |        | 70.09 | -50.25 | 55.13                                                | 2.37                                             |
| Sermeq Avannarleq (Lille Glacier)  |        | 70.55 | -50.49 | 21.85                                                | 0.17                                             |
| Sermeq Kujalleq (CW)               |        | 70.00 | -50.16 | 44.60                                                | 7.68                                             |
| Sermeq Kujalleq (Jakobshavn Isbræ) |        | 69.18 | -49.80 | 73.93                                                | 42.15                                            |
| Sermeq Kujalleq (Store Glacier)    |        | 70.41 | -50.54 | 66.00                                                | 9.14                                             |
| Sermeq Silarleq                    |        | 70.83 | -50.76 | 37.38                                                | 3.43                                             |
| Sermilik                           |        | 70.63 | -50.62 | 43.79                                                | 0.99                                             |
| Umiammakku Sermiat                 |        | 71.81 | -52.36 | 70.98                                                | 1.31                                             |
| Dietrichson Glacier                |        | NW    | 75.46  | -58.06                                               | 32.98                                            |

|                                         |    |       |        |       |       |         |
|-----------------------------------------|----|-------|--------|-------|-------|---------|
| Ikissuup Sermersua                      |    | 74.23 | -55.83 | 30.11 | 0.77  |         |
| Illullip Sermia                         |    | 74.42 | -55.97 | 30.47 | 4.97  |         |
| Innaqqissorsuup Oqquani Sermeq          |    | 76.38 | -62.77 | 47.29 | 2.78  |         |
| Issuusarsuit Sermiat                    |    | 76.07 | -60.63 | 17.63 | 1.11  |         |
| Kangerluarsuup Sermia (Bowdoin Glacier) |    | 77.69 | -68.58 | 11.45 | 0.19  |         |
| Naajarsuit Sermiat                      |    | 73.25 | -55.08 | 49.90 | 1.40  |         |
| Nansen Glacier                          |    | 75.78 | -58.83 | 52.71 | 6.34  |         |
| Qaajuarsuup Sermia                      |    | 77.52 | -65.67 | 63.95 | 1.75  |         |
| Qeqertarsuup Sermia                     |    | 73.59 | -55.53 | 21.48 | 0.73  |         |
| Rink Glacier                            |    | 76.22 | -61.00 | 18.13 | 1.30  |         |
| Salliarutsip Sermia                     |    | 72.04 | -52.61 | 37.12 | 0.96  |         |
| Sermeq (Upernavik Isstrøm) 1            |    | 72.78 | -54.25 | 27.02 | 2.97  | } 3.16  |
| Sermeq (Upernavik Isstrøm) 2            |    | 72.84 | -54.28 | 57.66 | 0.19  |         |
| Sermeq Avamarleq                        |    | 73.94 | -55.77 | 18.67 | 1.96  |         |
| Sermeq Kujalleq (NW)                    |    | 73.83 | -55.58 | 52.17 | 2.17  |         |
| Sermersuaq                              |    | 75.32 | -57.83 | 44.96 | 3.43  |         |
| Sverdrup Glacier                        |    | 75.62 | -57.97 | 46.69 | 4.15  |         |
| Tuttulikassaap Sermia 1                 |    | 74.90 | -56.90 | 25.15 | 6.67  | } 13.35 |
| Tuttulikassaap Sermia 2                 |    | 74.96 | -57.04 | 54.16 | 6.68  |         |
| Tuttulipaluup Sermia                    |    | 77.70 | -66.23 | 46.44 | 0.57  |         |
| Ullip Sermia                            |    | 76.58 | -67.63 | 25.70 | 0.94  |         |
| Yngvar Nielsen Glacier                  |    | 76.33 | -64.08 | 79.64 | 0.88  |         |
| Christian IV Glacier                    |    | 68.70 | -30.62 | 46.85 | 4.39  |         |
| Daugaard Jensen Glacier                 | CE | 71.75 | -29.00 | 67.72 | 9.48  |         |
| Frederiksborg Glacier                   |    | 68.46 | -31.66 | 24.30 | 0.28  |         |
| Kangerlussuaq Glacier                   |    | 68.67 | -33.08 | 58.88 | 24.21 |         |
| A.P. Bernstorff Glacier                 |    | 63.88 | -41.77 | 85.88 | 3.69  |         |
| Apuseerajik                             | SE | 66.38 | -37.54 | 75.03 | 2.70  |         |
| Apusiigajik                             |    | 63.29 | -41.92 | 88.47 | 1.99  |         |
| Graulv                                  |    | 64.35 | -41.57 | 90.98 | 4.78  |         |
| Heimdal Glacier                         |    | 62.91 | -42.69 | 63.31 | 2.09  |         |
| Helheim Glacier                         |    | 66.37 | -38.31 | 72.93 | 27.83 |         |
| Rimfaxe/Guldfaxe                        |    | 63.31 | -42.37 | 45.34 | 1.59  |         |

**Table S 3 | Comparison of decadal mean frontal ablation estimates**

Comparison of mean frontal ablation estimates [GT/a] from Kochtitzky et al. (2023) and this study for the periods 2000-2010, and 2010- 2020. Only shows tidewater glaciers that are investigated in both studies. Colours indicate where estimates presented in this study are within the uncertainty boundaries of Kochtitzky et al. (2023).

| Glacier names                   | Kochtitzky et al. (2023) |                     | This study          |                     |
|---------------------------------|--------------------------|---------------------|---------------------|---------------------|
|                                 | Annual mean 2000-10      | Annual mean 2010-20 | Annual mean 2000-10 | Annual mean 2010-20 |
| Akullersuup Sermia              | 0.76±0.24                | 0.58±0.13           | 0.72±0.15           | 1.51±0.15           |
| AP Bernstorff Glacier           | 4.98±0.11                | 4.63±0.08           | 4.31±2.16           | 4.49±2.6            |
| Apuseerajik                     | 2.36±0.08                | 2.97±0.06           | 2.53±1.10           | 3.54±1.10           |
| Christian IV Glacier            | 3.96±0.26                | 3.57±0.19           | 4.13±0.78           | 4.73±0.78           |
| Daugaard Jensen Glacier         | 8.12±0.12                | 8.77±0.10           | 9.24±2.60           | 9.93±2.60           |
| Eqip Sermia                     | 0.56±0.07                | 0.86±0.05           | 0.79±0.67           | 1.88±0.67           |
| Frederiksborg Glacier           | 0.28±0.14                | 0.23±0.11           | 0.28±0.29           | 1.01±0.29           |
| Graulv                          | 4.82±0.08                | 4.29±0.05           | 5.01±1.21           | 5.26±1.21           |
| Heimdal Glacier                 | 1.34±0.05                | 1.24±0.04           | 1.56±0.21           | 3.12±0.21           |
| Helheim Glacier                 | 28.39±0.21               | 27.17±0.14          | 28.53±6.25          | 28.66±6.25          |
| Ikissuup Sermersua              | 0.62±0.33                | 0.69±0.24           | 0.69±0.66           | 1.71±0.66           |
| Illullip Sermia                 | 5.46±0.39                | 5.67±0.22           | 5.16±0.95           | 6.03±0.95           |
| Innaqqissorsuup Oqquani Sermeq  | 3.14±0.39                | 3.51±0.48           | 2.77±0.60           | 3.40±0.60           |
| Issuusarsuit Sermiat            | 3.62±0.34                | 3.93±0.24           | 1.03±0.23           | 2.17±0.23           |
| Kangerluarsuup Sermia (Bowdoin) | 0.19±0.16                | 0.19±0.15           | 0.20±0.11           | 1.16±0.11           |
| Kangerlussuaq Gletsjer          | 27.04±0.27               | 27.31±0.19          | 28.42±6.08          | 27.82±6.08          |
| Kangerlussuup Sermia            | 1.62±0.11                | 1.59±0.08           | 1.92±0.77           | 2.51±0.77           |
| Kangiata Nunaata Sermia         | 5.13±0.09                | 4.71±0.07           | 5.84±2.42           | 5.48±2.42           |
| Kangilernata Sermia             | 1.21±0.13                | 1.96±0.08           | 0.84±0.45           | 1.87±0.45           |
| Kangilliup Sermia (Rink Isbræ)  | 12.23±0.16               | 11.65±0.12          | 13.19±2.26          | 12.88±2.26          |
| Naajarsuit Sermiat              | 1.17±0.13                | 0.96±0.09           | 1.37±0.35           | 1.85±0.35           |
| Narsap Sermia                   | 1.56±0.14                | 2.88±0.07           | 1.75±0.56           | 4.36±0.56           |
| Qaqujaarsuup Sermia             | 1.71±0.18                | 1.76±0.12           | 1.73±1.47           | 2.49±1.47           |
| Qeqertarsuup Sermia             | 0.70±0.11                | 0.81±0.08           | 0.82±0.18           | 1.59±0.18           |
| Rimfaxe/Guldfaxe                | 1.79±0.10                | 1.74±0.08           | 1.75±0.26           | 1.75±0.26           |
| Rink Glacier                    | 1.23±0.38                | 1.18±0.23           | 1.49±0.60           | 1.79±0.60           |
| Salliarutsip Sermia             | 0.84±0.10                | 1.94±0.06           | 0.85±0.68           | 2.12±0.68           |
| Saqqarliup Sermia               | 0.06±0.31                | 0.14±0.33           | 0.21±0.32           | 1.06±0.32           |
| Sermeq Avandarleq               | 1.83±0.25                | 1.82±0.17           | 1.93±0.36           | 2.62±0.36           |



|                                    |                    |                    |                     |                     |
|------------------------------------|--------------------|--------------------|---------------------|---------------------|
| Sermeq Avannarleq                  | 2.21±0.14          | 2.04±0.09          | 2.38±0.42           | 2.93±0.42           |
| Sermeq Kujalleq (Jakobshavn Isbræ) | 36.27±0.78         | 42.28±0.52         | 48.75±15.93         | 47.63±15.93         |
| Sermeq Kujalleq (CW)               | 7.44±0.23          | 6.12±0.21          | 8.03±1.31           | 8.05±1.31           |
| Sermeq Kujalleq (NW)               | 1.86±0.10          | 1.95±0.07          | 2.03±0.53           | 2.78±0.53           |
| Sermeq Kujalleq (Store Glacier)    | 7.92±0.12          | 8.03±0.08          | 9.14±1.21           | 9.40±1.21           |
| Sermeq(Upernavik_Isstrøm)1         | 0.33±0.16          | 0.33±0.11          | 3.12±0.88           | 3.21±0.88           |
| Sermeq(Upernavik Isstrøm)2         | 7.74±0.28          | 9.19±0.19          | 0.16±0.87           | 0.97±0.87           |
| Sermersuaq                         | 5.15±0.62          | 6.81±0.637         | 3.57±2.56           | 4.80±2.56           |
| Sverdrup Glacier                   | 5.03±0.27          | 6.59±0.15          | 4.47±2.40           | 6.42±2.40           |
| Ullip Sermia                       | 0.99±0.48          | 0.81±0.28          | 0.96±0.66           | 1.66±0.66           |
| Umiammakku Sermiat                 | 3.50±0.16          | 4.24±0.10          | 1.60±1.19           | 2.10±1.19           |
| Ullip Sermia                       | 0.99±0.48          | 0.81±0.48          | 0.96±0.66           | 1.66±0.66           |
| Umiammakku Sermiat                 | 3.50±0.16          | 4.24±0.16          | 1.60±1.19           | 2.10±1.19           |
| Yngvar Nielsen Glacier             | 0.54±0.13          | 1.07±0.13          | 0.63±2.04           | 1.56±2.04           |
| <b>Total</b>                       | <b>210.71±9.64</b> | <b>224.34±7.26</b> | <b>217.11±68.64</b> | <b>245.59±68.64</b> |

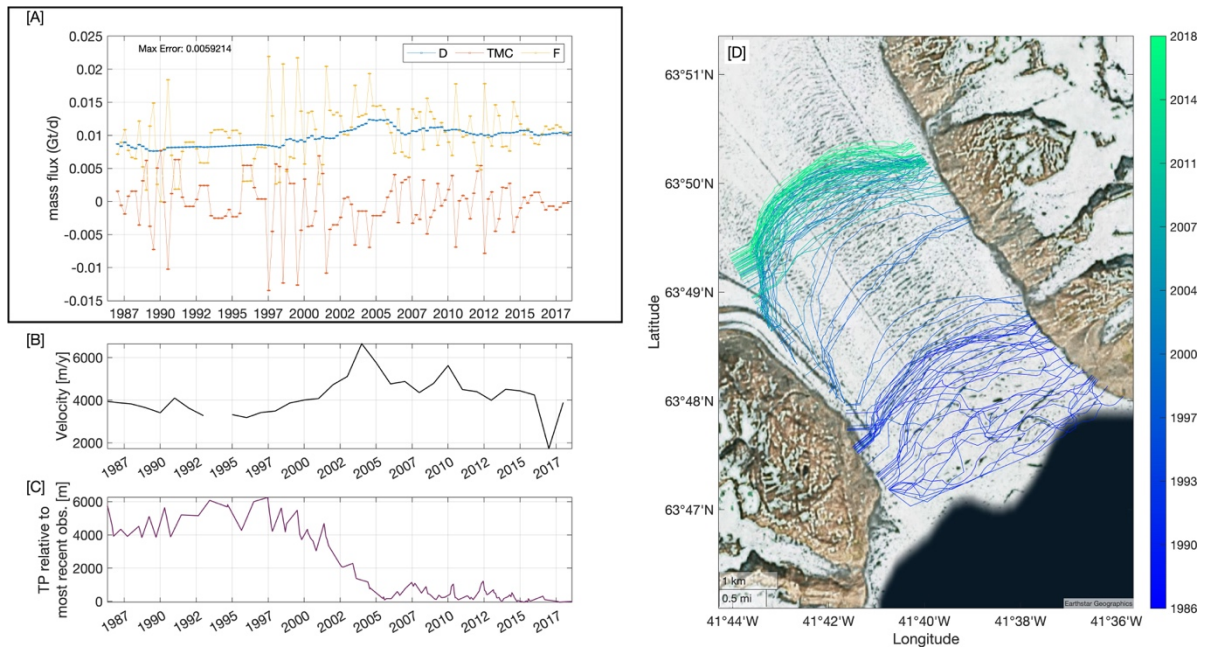

**Figure S 2 | Results for A.P. Bernstorff Glacier**

Example of output data for Helheim Glacier, SE Greenland shown in A) with three-monthly frontal ablation estimates shown in yellow, and discharge (blue) and terminus associated mass change (TMC, red) shown for comparison. Maximum error is also shown (for details see supplementary). B) Annual flow velocity in m/yr from NASA ITS\_LIVE data B) Terminus position (TP) relative to most recent observation along the centerline. Panels B) and C) are only shown for validation purposes and are not part of the dataset. D) Terminus positions used to calculate frontal ablation estimates colour coded by date.

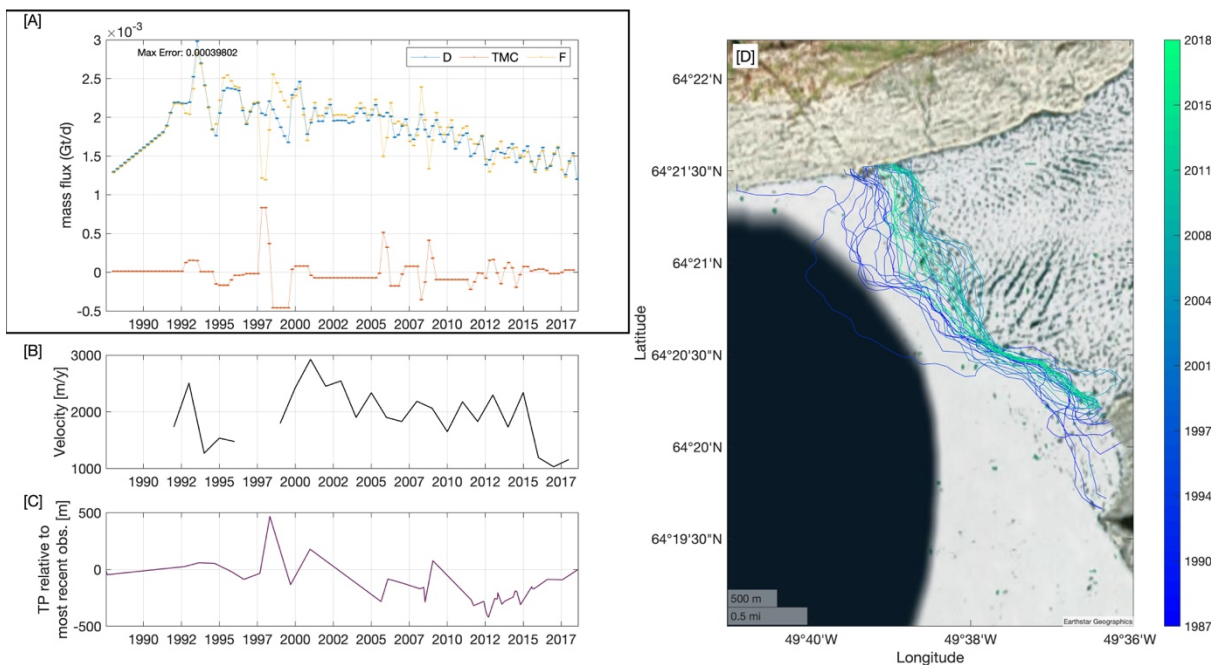

**Figure S 3 | Results for Akullersuup Sermia**

Same as in Figure S 2

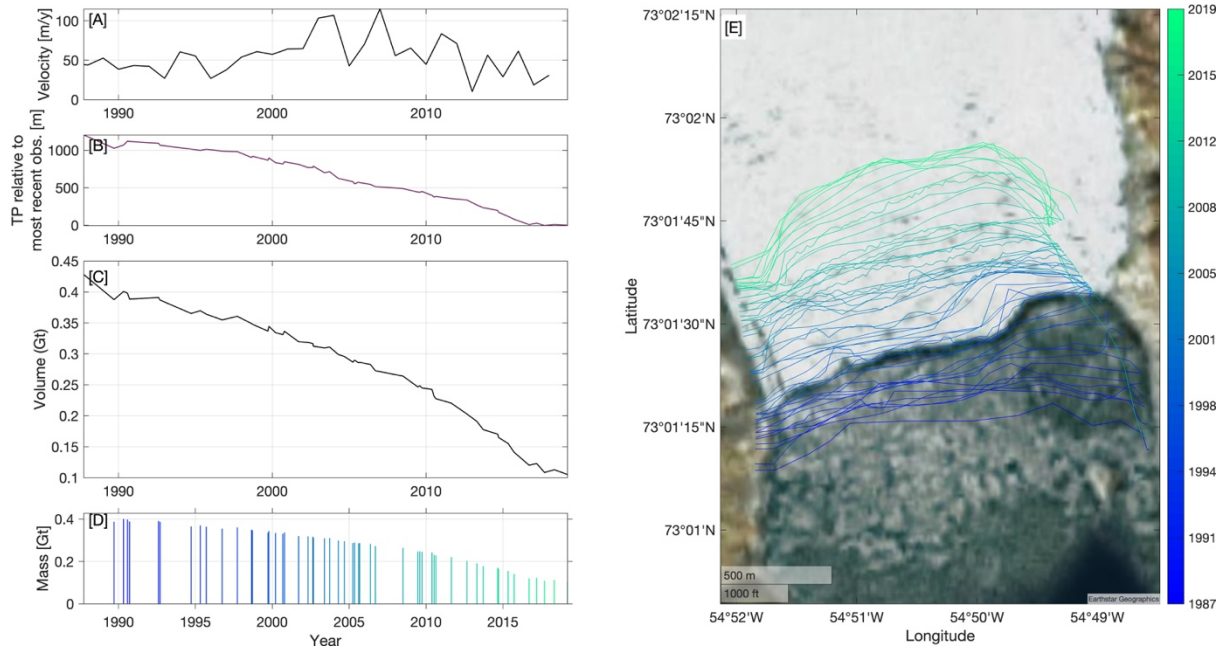

**Figure S 4 | Results for Akullikassaap Sermia \*Volume Only\***

A) Annual flow velocity in m/yr from NASA ITS\_LIVE data B) Terminus position relative to most recent observation along the centerline. C) Volume change displayed only as no discharge data from Mankoff et al. (2020) available. D). Mass of each polygon that is associated with a terminus delineation, colours correspond to individual terminus position shown in E. E) Colour-coded terminus positions to correspond with frontal ablation data. Basemap from Earthstar Geographics.

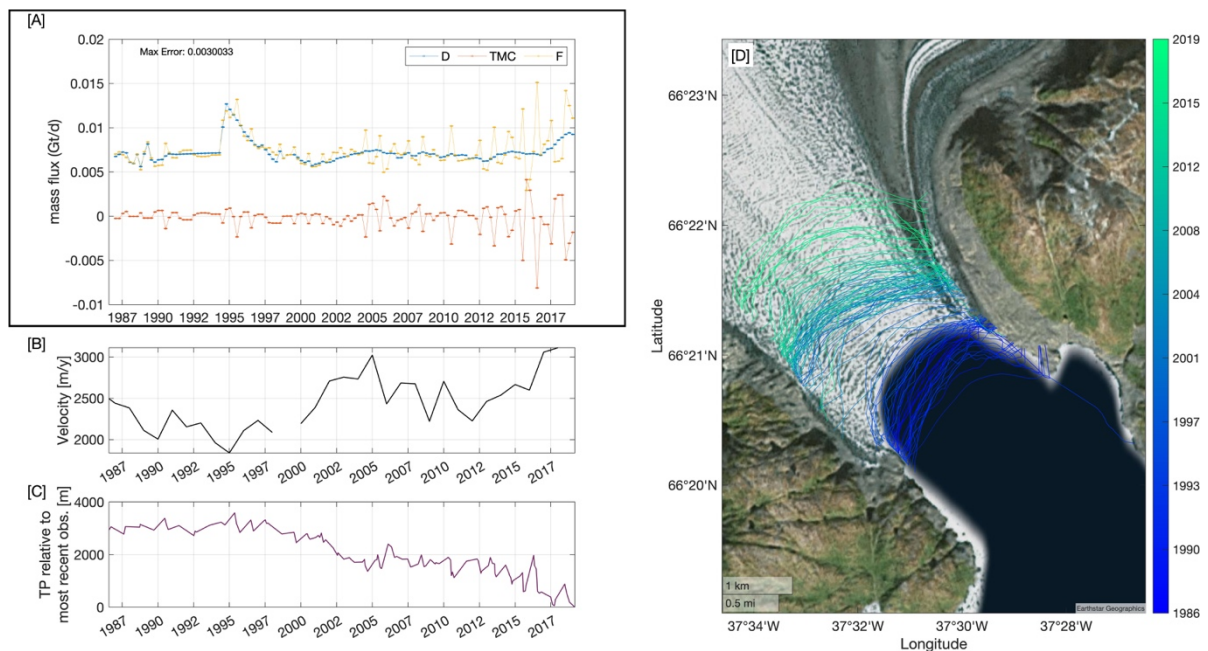

**Figure S 5 | Results for Apuseerajik**

Same as in Figure S 2

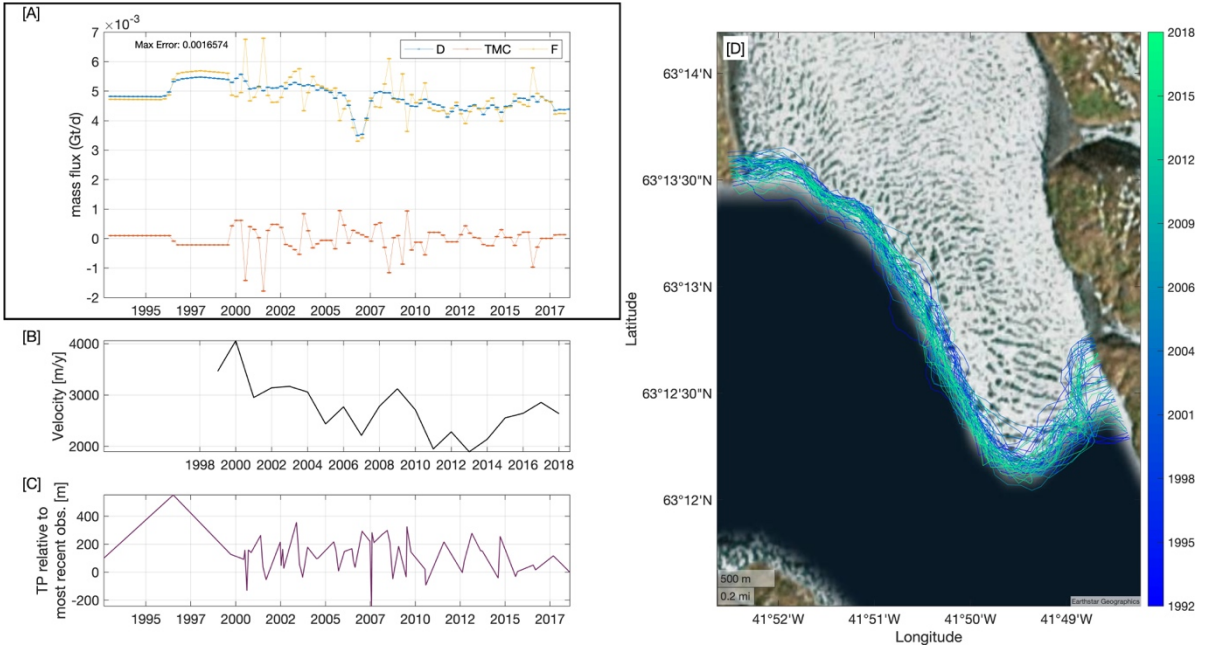

**Figure S 6 | Results for Apusiigajik**

Same as in Figure S 2

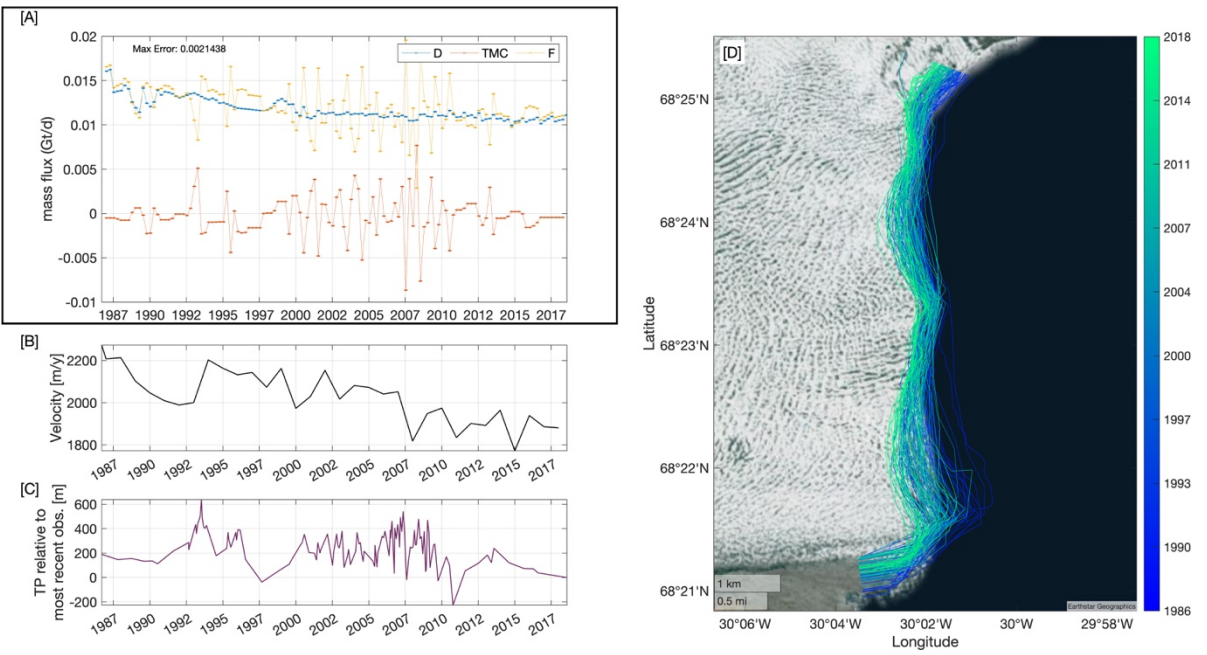

**Figure S 7 | Results for Christian IV Glacier**

Same as in Figure S 2



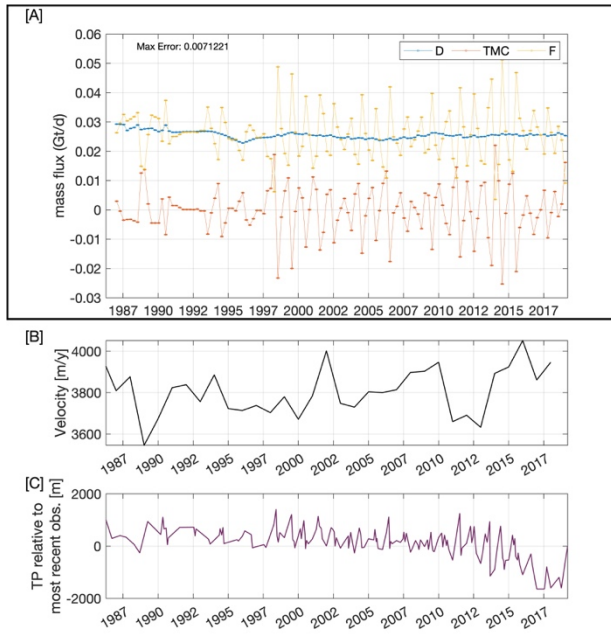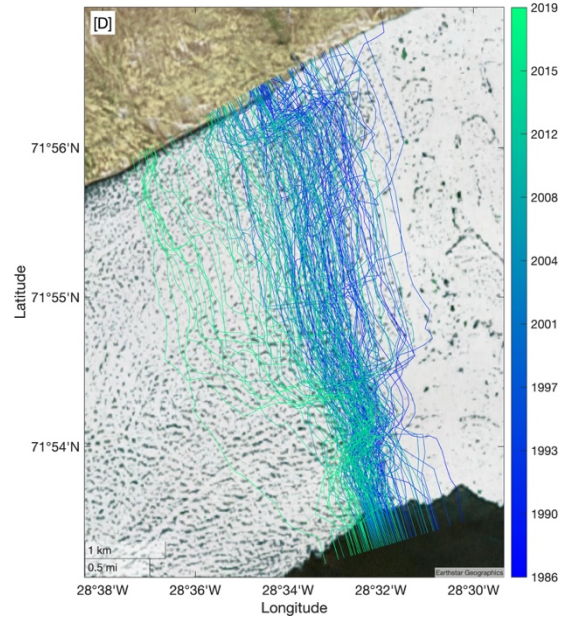

**Figure S 8 | Results for Dugaard Jensen Glacier**

Same as in Figure S 2

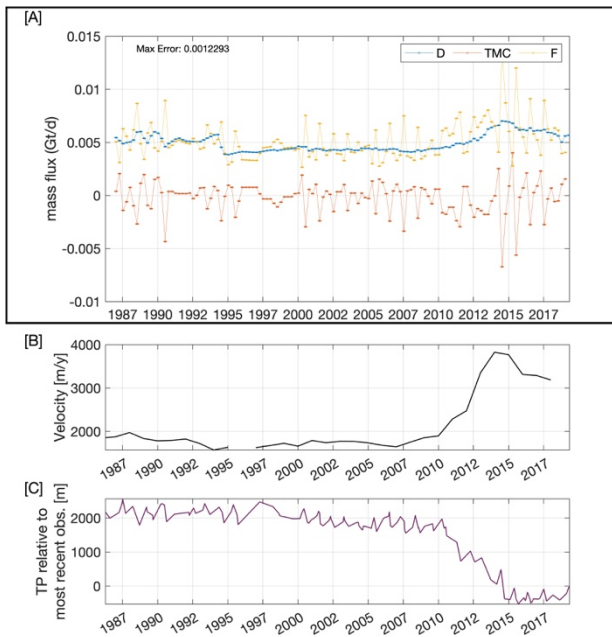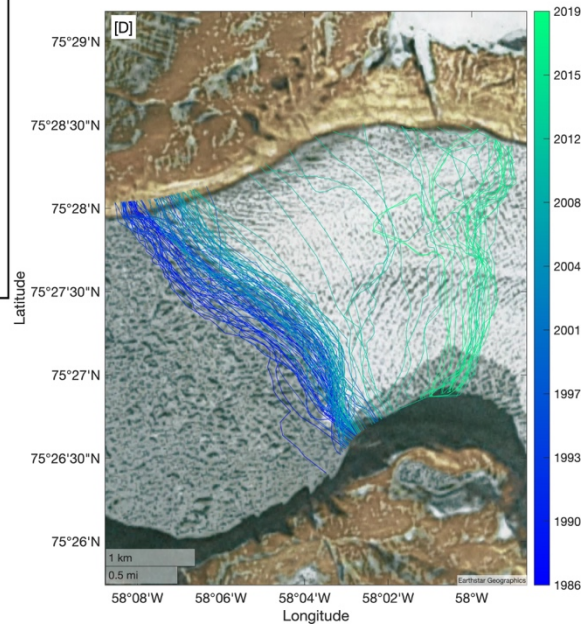

**Figure S 9 | Results for Dietrichson Glacier**

Same as in Figure S 2

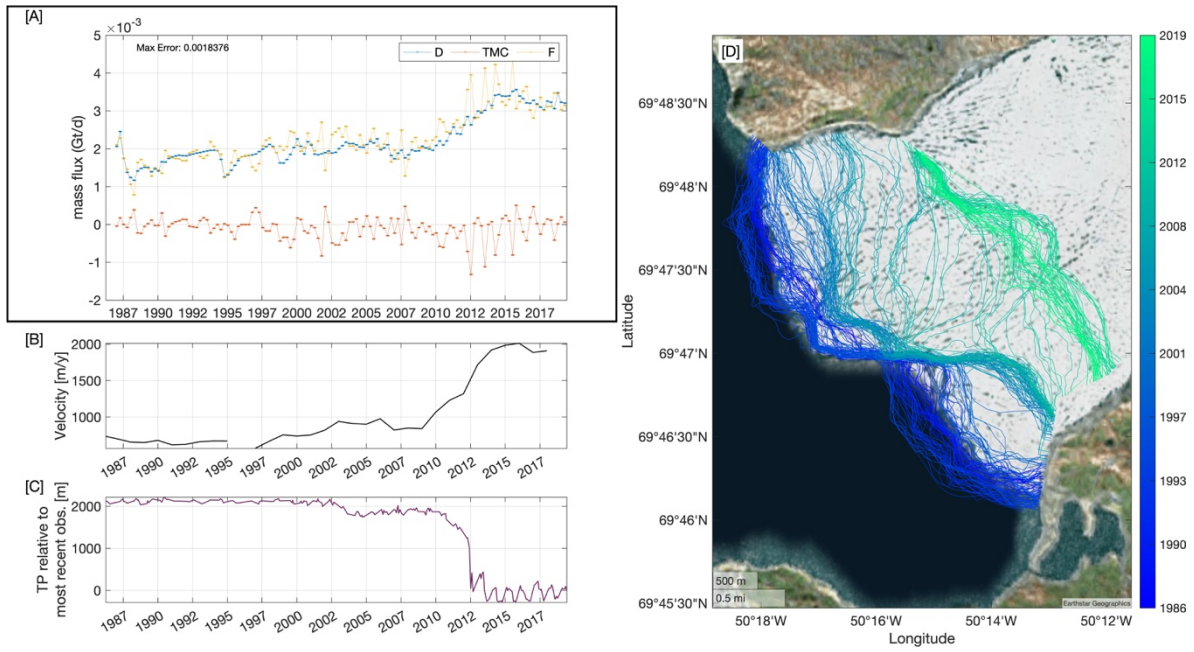

**Figure S 11 | Results for Eqip Sermia**

Same as in Figure S 2

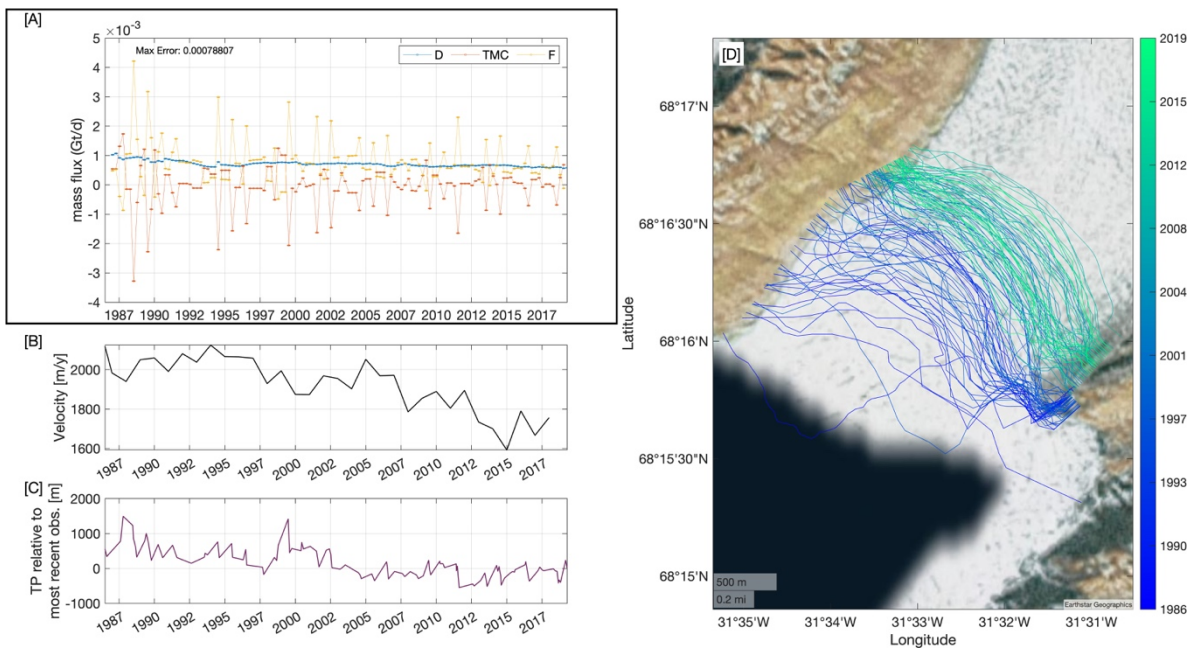

**Figure S 10 | Frederiksborg Glacier**

Same as in Figure S 2

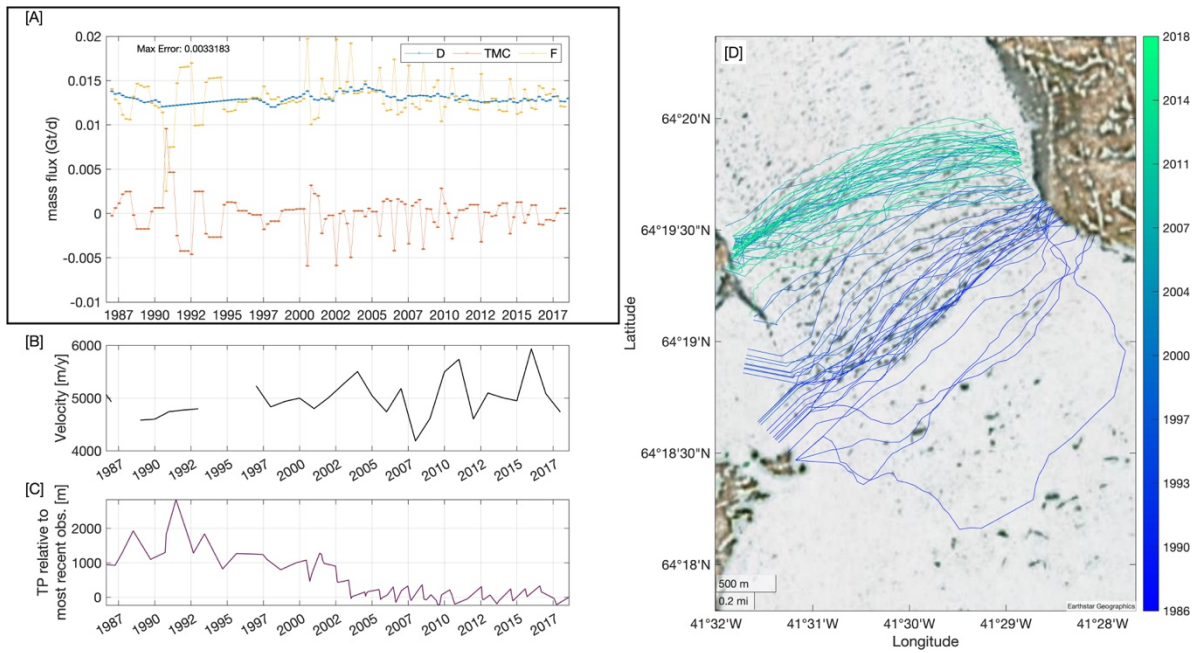

**Figure S 12 | Results for Graulv**

Same as in Figure S 2

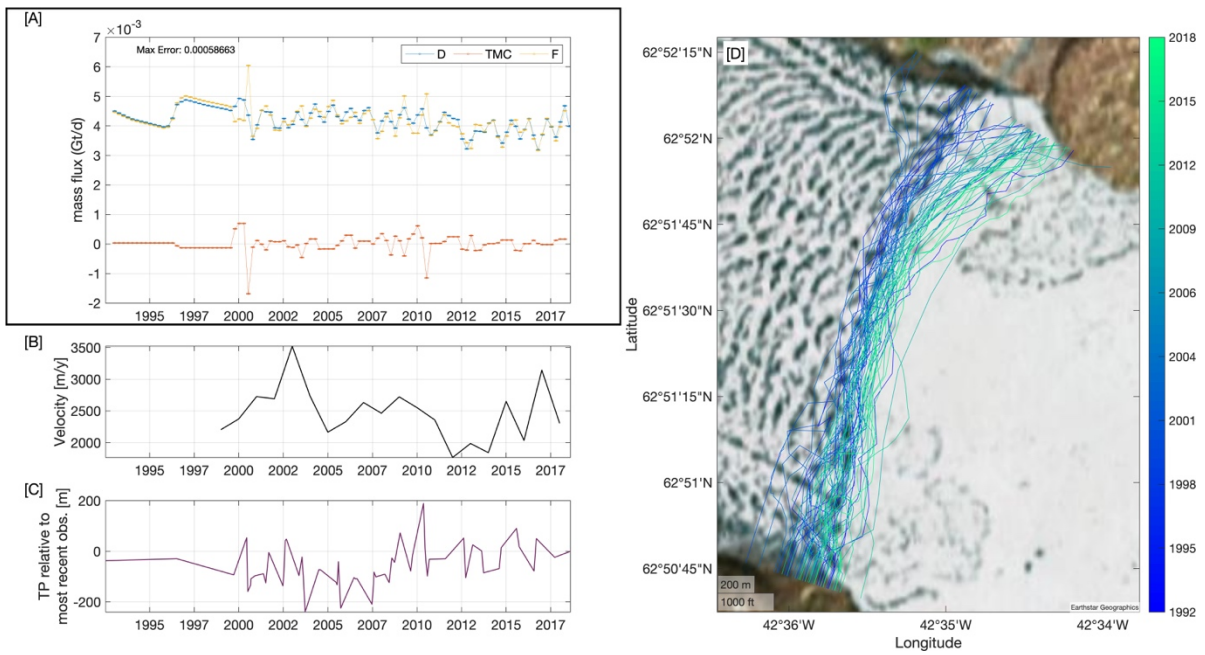

**Figure S 13 | Results for Heimdal Glacier**

Same as in Figure S 2



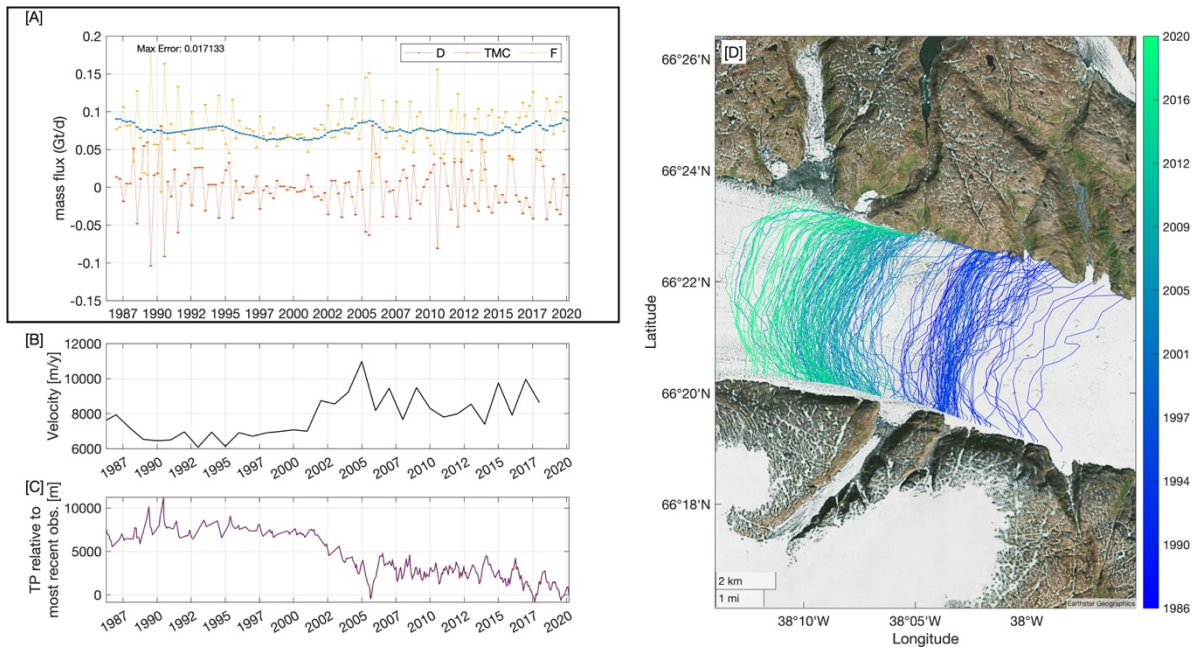

**Figure S 14 | Results for Helheim Glacier**

Same as in Figure S 2

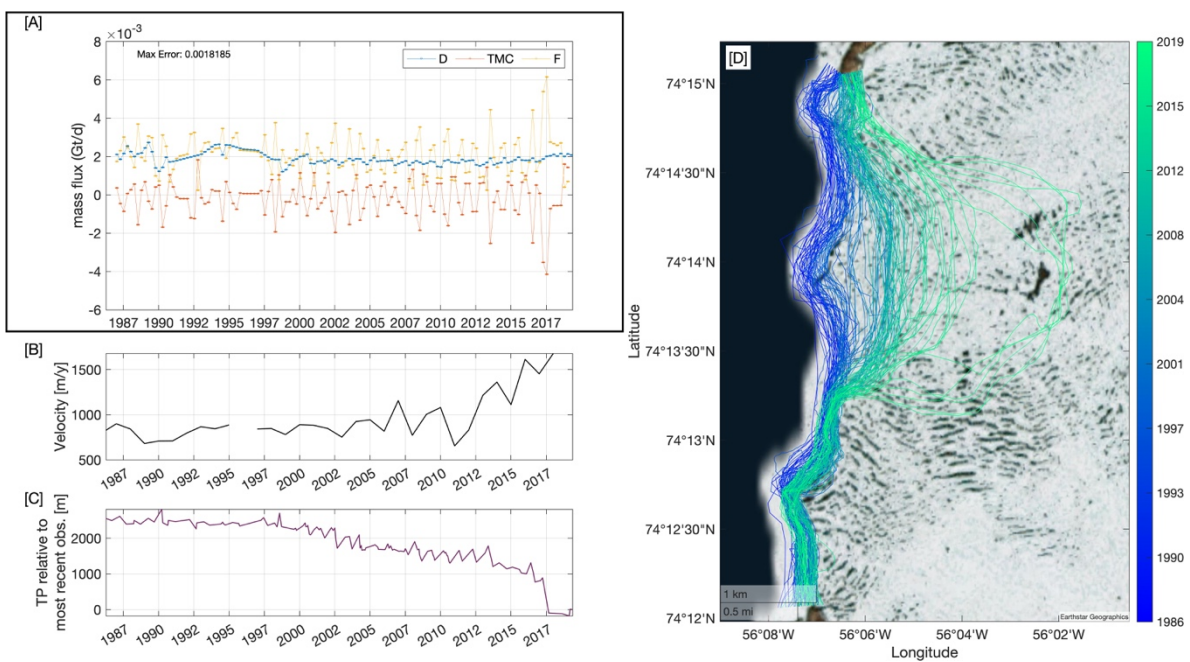

**Figure S 15 | Results for Ikissuup Sermersua**

Same as in Figure S 2



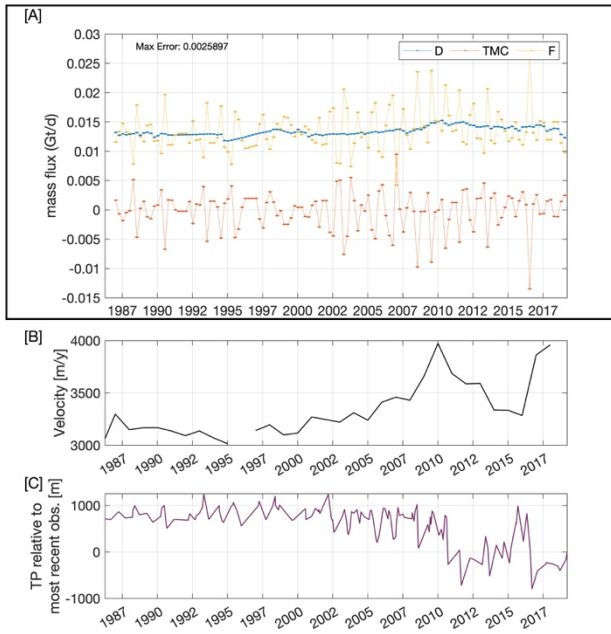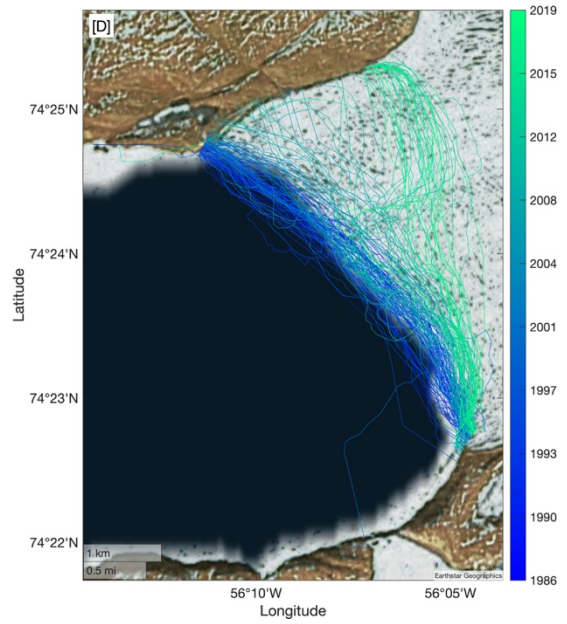

**Figure S 16 | Results for Illullip Sermia**

Same as in Figure S 2

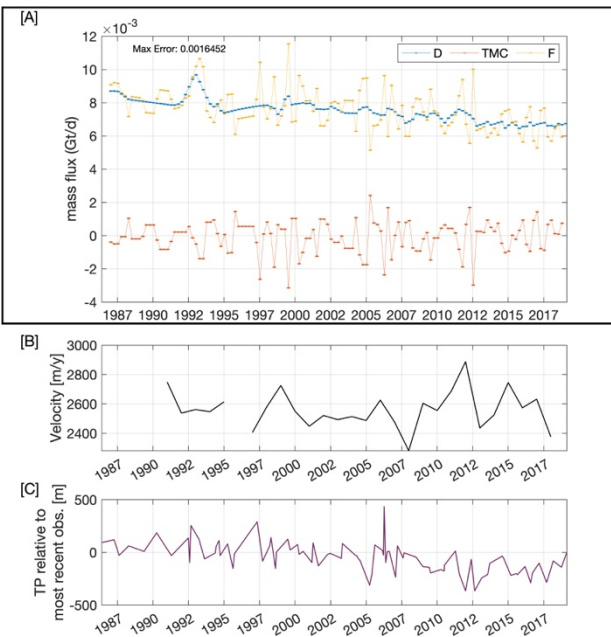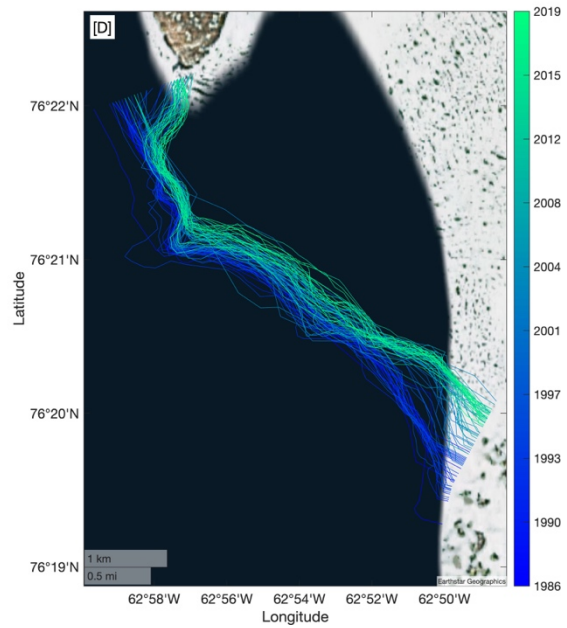

**Figure S 17 | Results for Innaqqissorsuup Oqqvani Sermeq**

Same as in Figure S 2

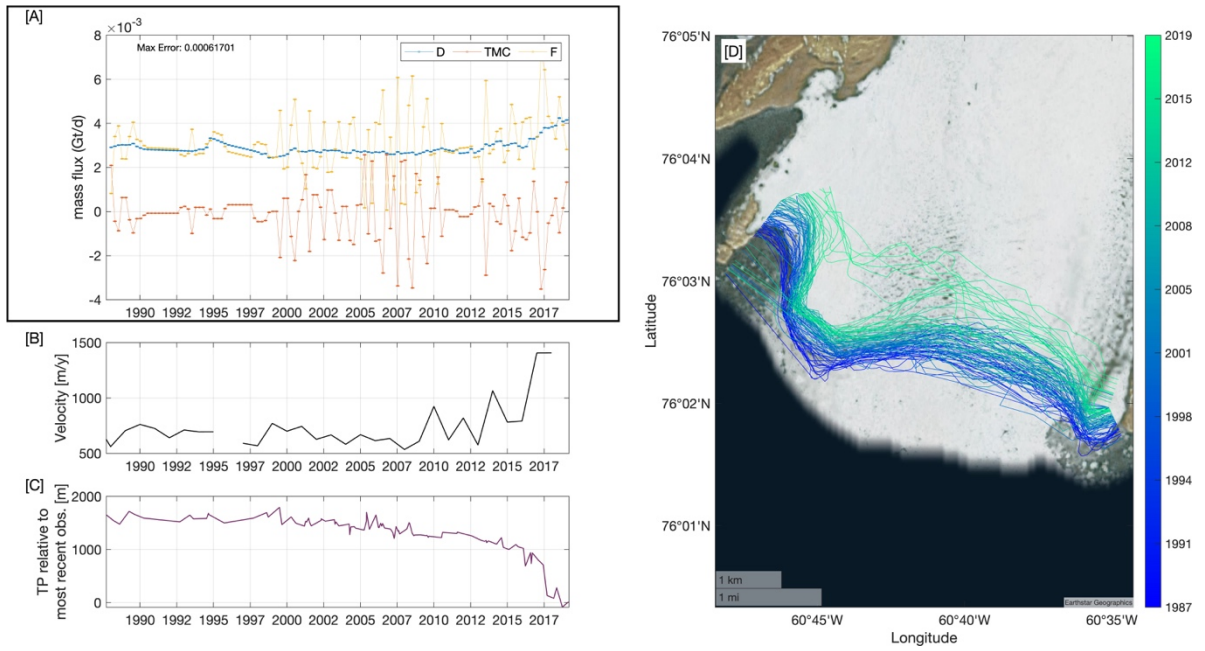

**Figure S 18 | Results for Issuusarsuit Sermiat**

Same as in Figure S 2

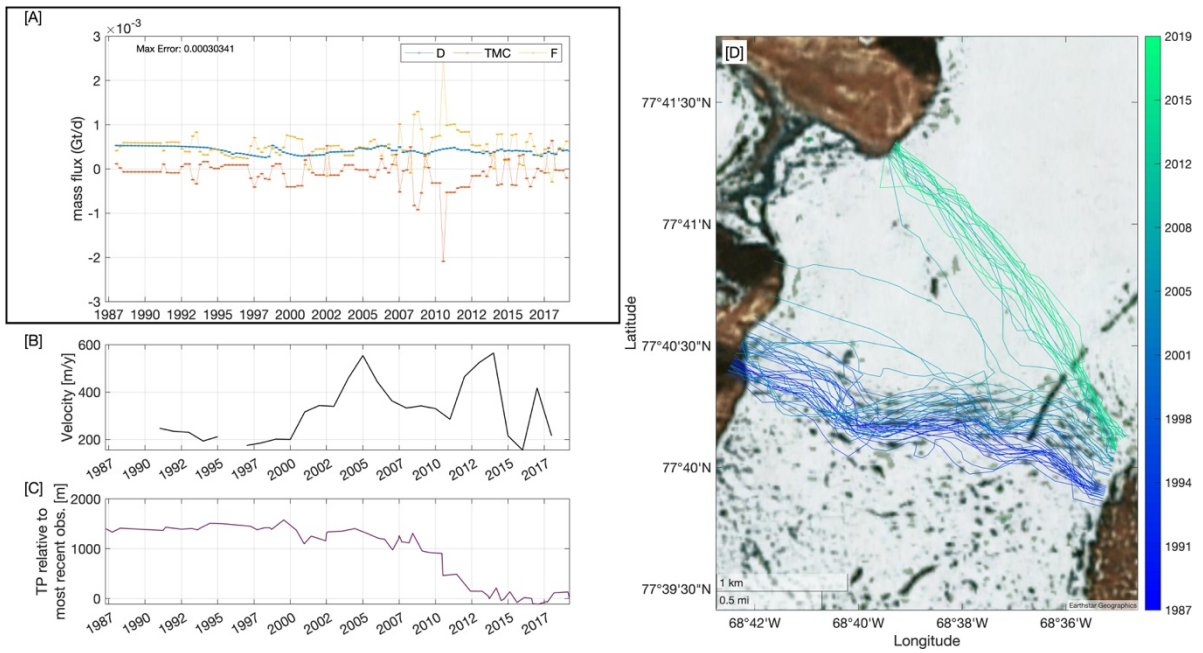

**Figure S 19 | Results for Kangerluarsuup Sermia (Bowdoin glacier)**

Same as in Figure S 2

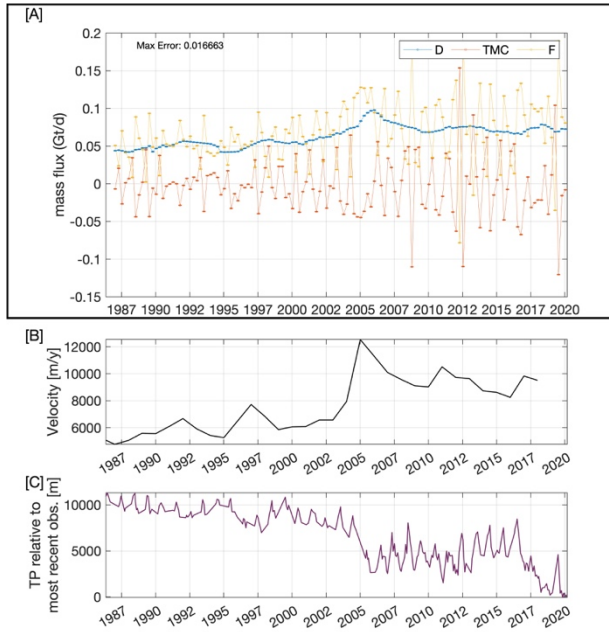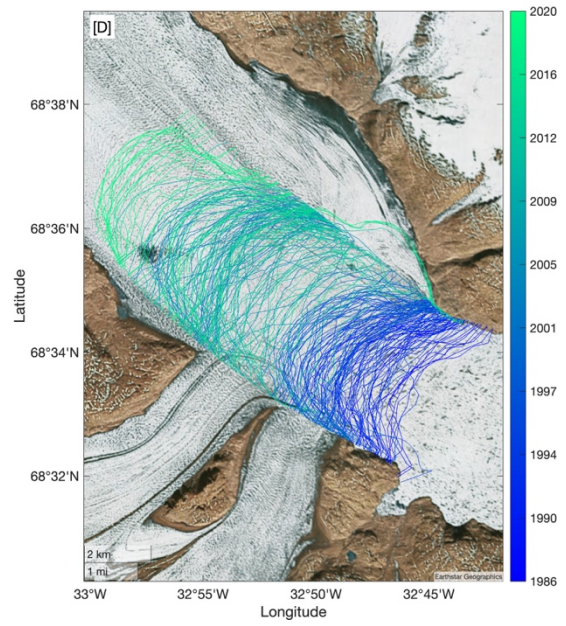

**Figure S 20 | Results for Kangerlussuaq Glacier**

Same as in Figure S 2

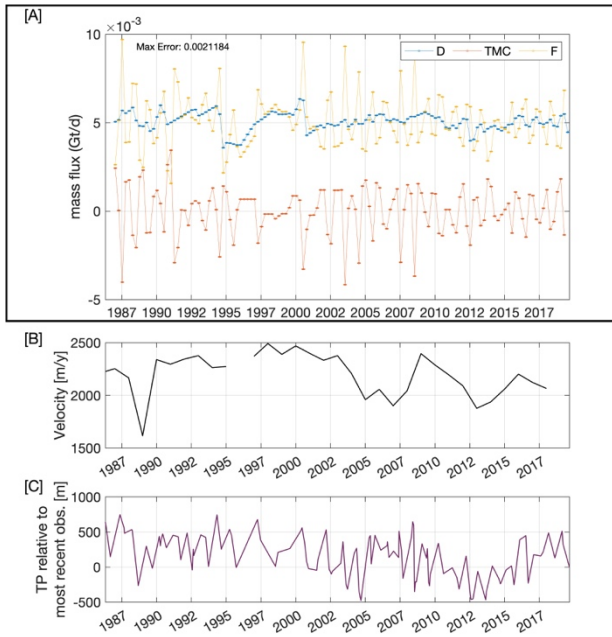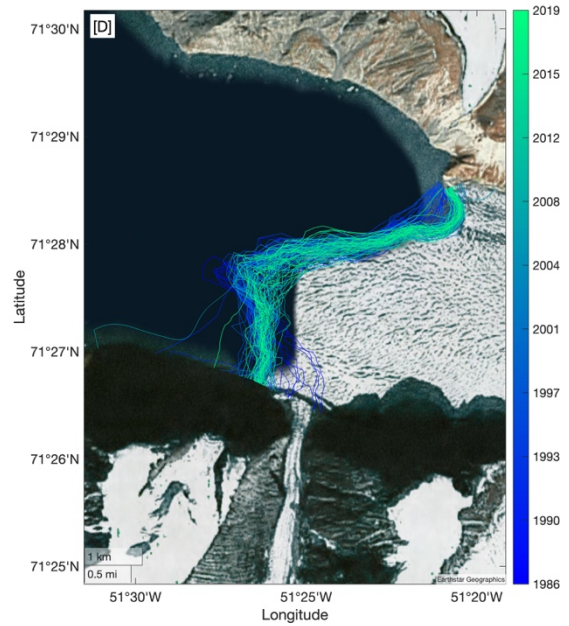

**Figure S 21 | Results for Kangerlussuaq Sermia**

Same as in Figure S 2



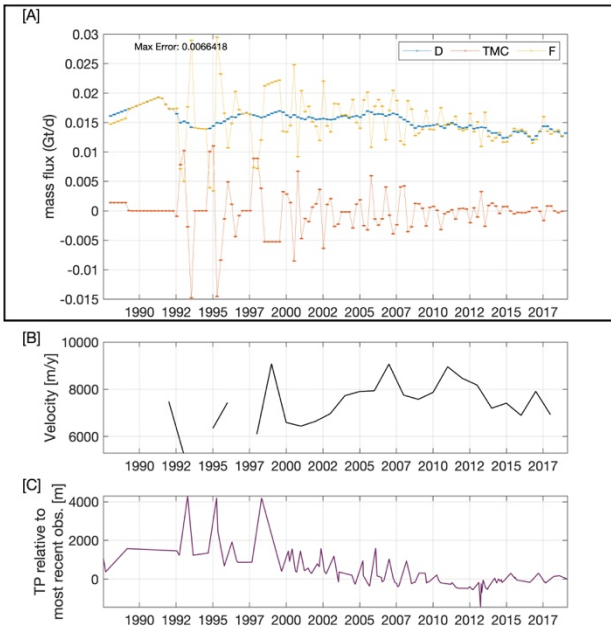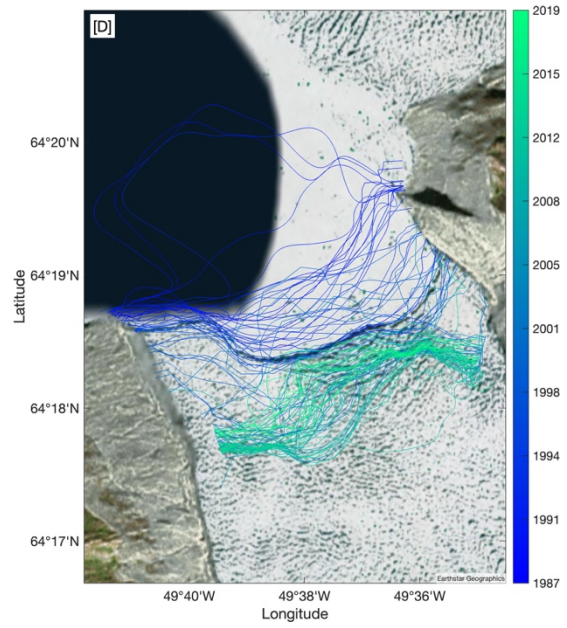

**Figure S 22 | Results for Kangiata Nunaata Sermia**

Same as in Figure S 2

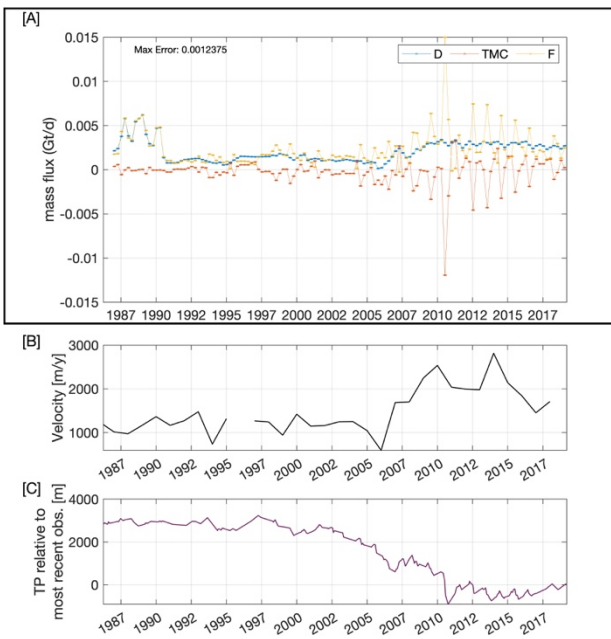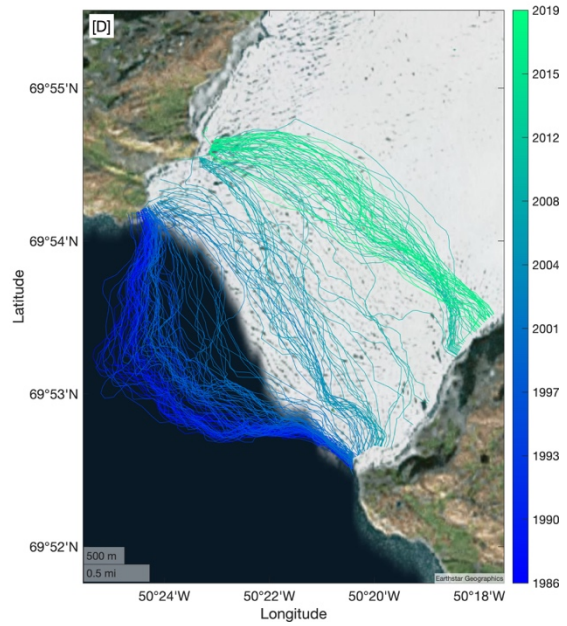

**Figure S 23 | Results for Kangilernata Sermia**

Same as in Figure S 2

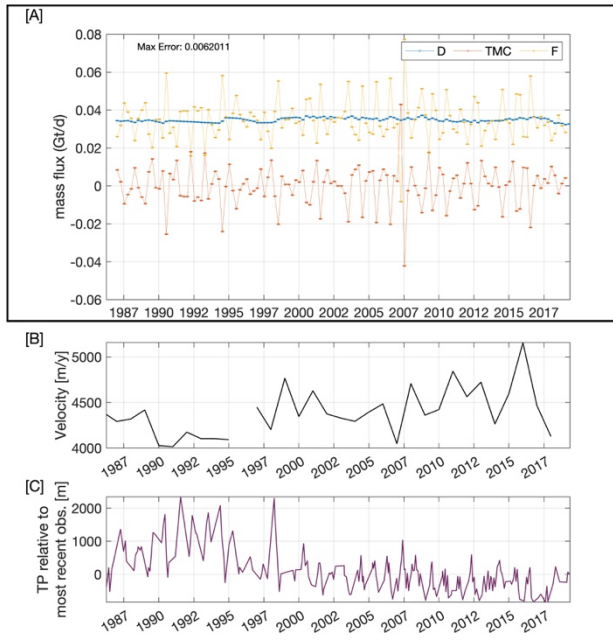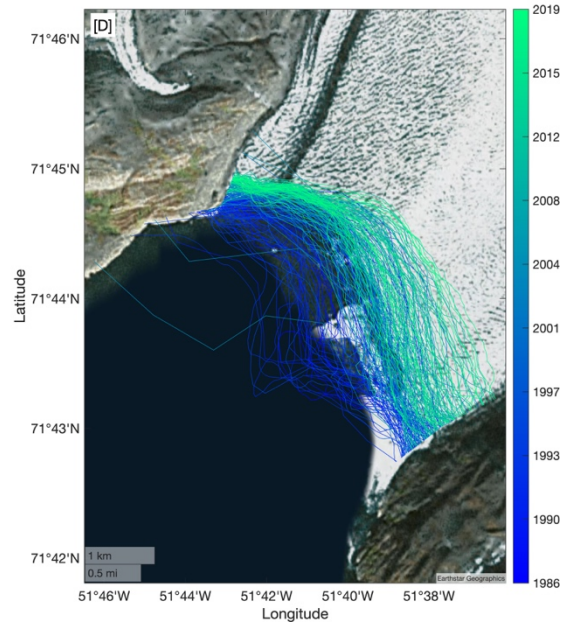

**Figure S 24 | Results for Kangilliup Sermia (Rink glacier)**

Same as in Figure S 2

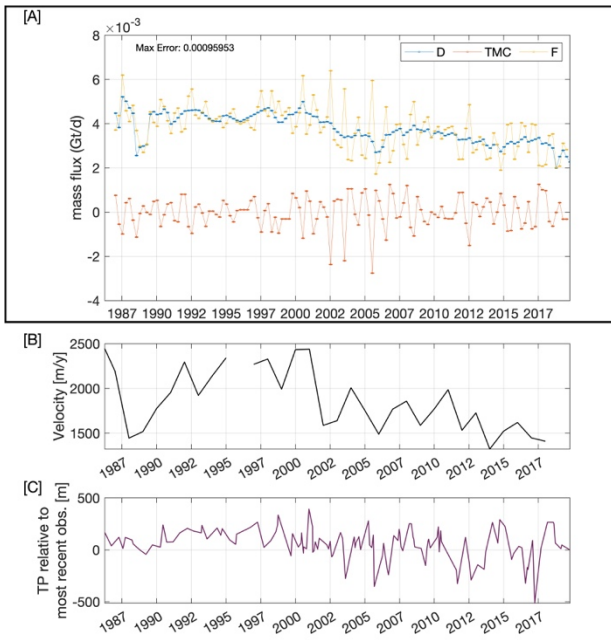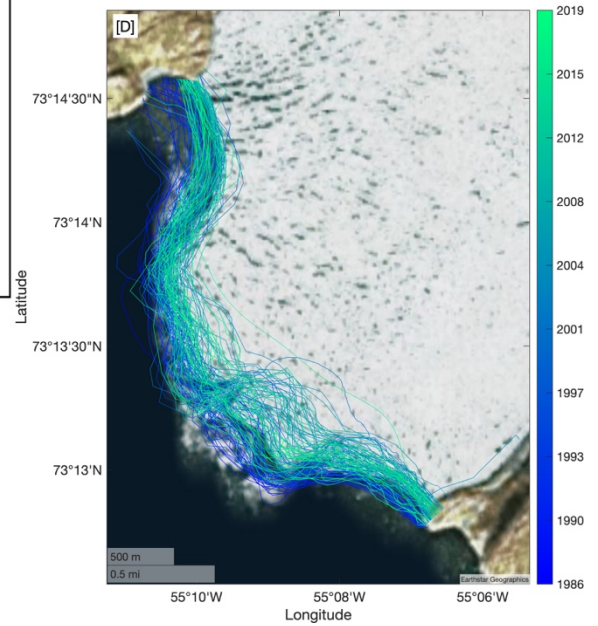

**Figure S 25 | Results for Naajarsuit Sermiat**

Same as in Figure S 2

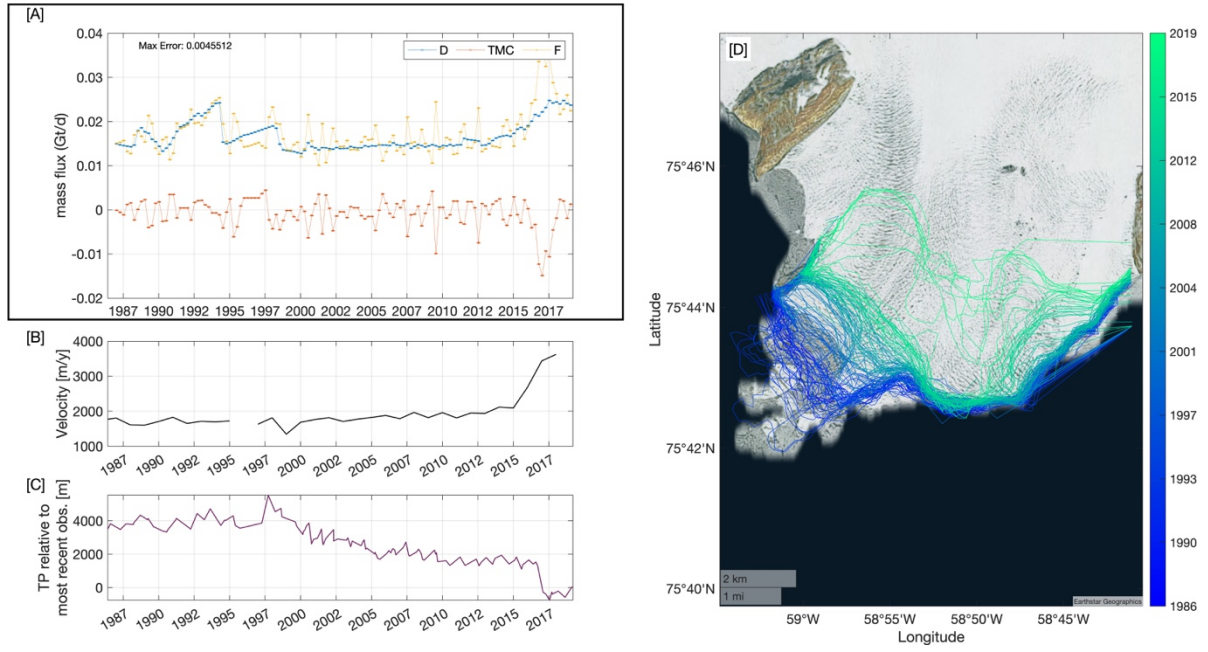

**Figure S 26 Results for Nansen Glacier**

Same as in Figure S 2

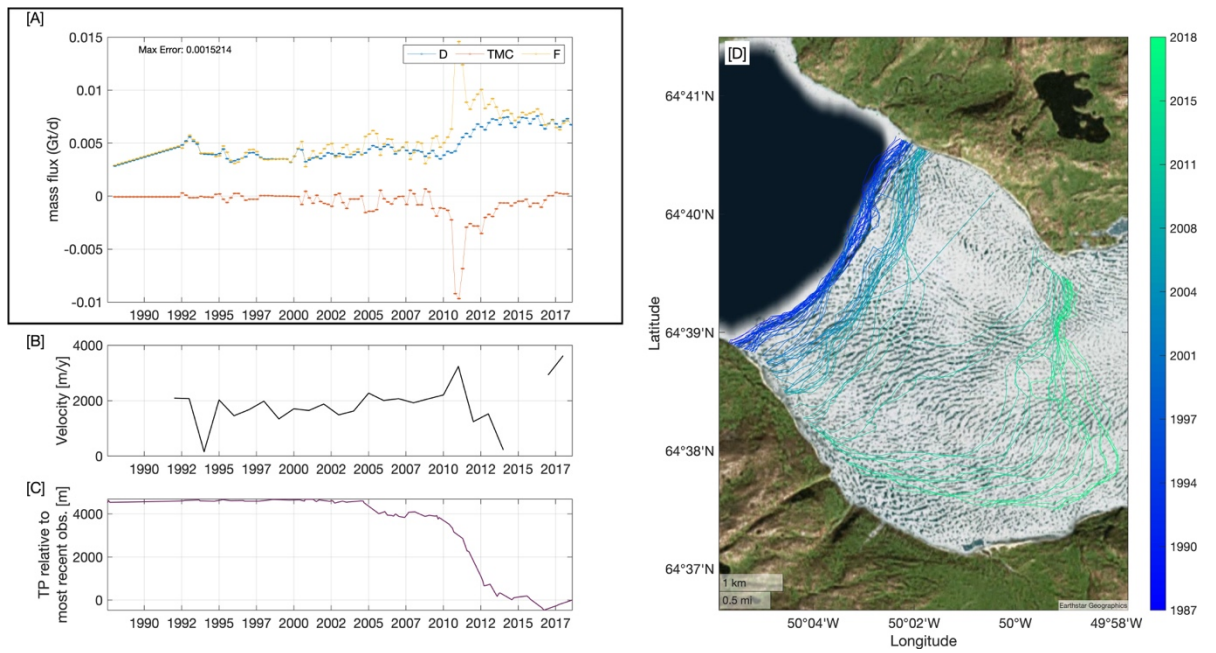

**Figure S 27 | Results for Narsap Sermia**

Same as in Figure S 2



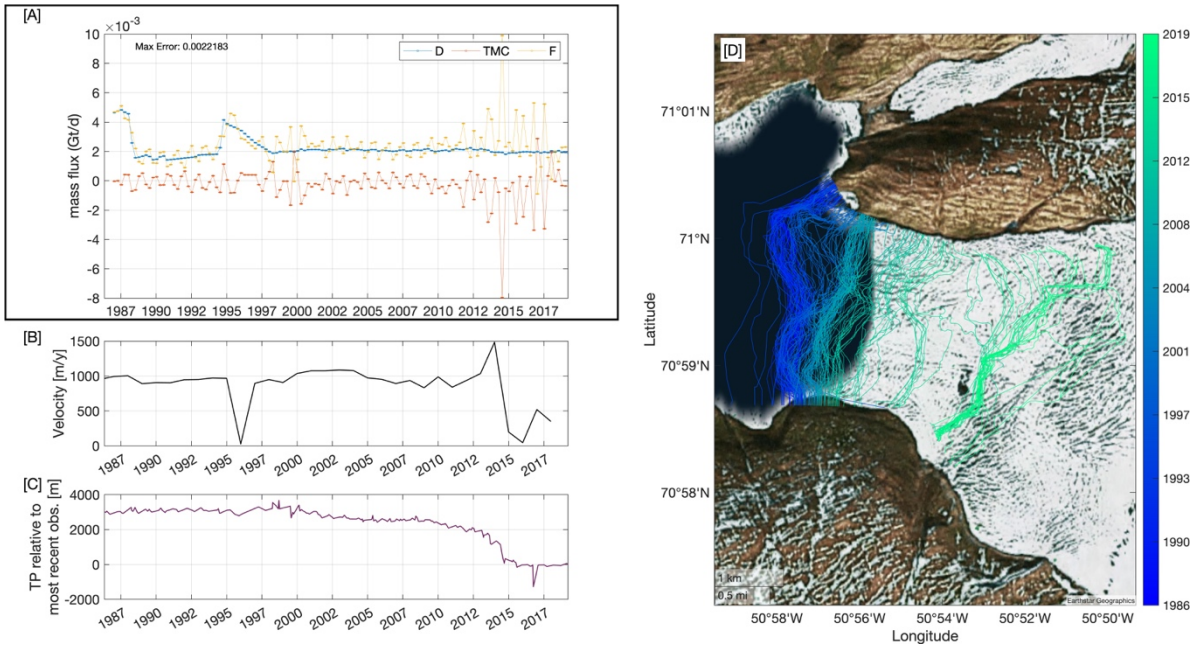

**Figure S 28 | Results for Perlerfiup Sermia**

Same as in Figure S 2

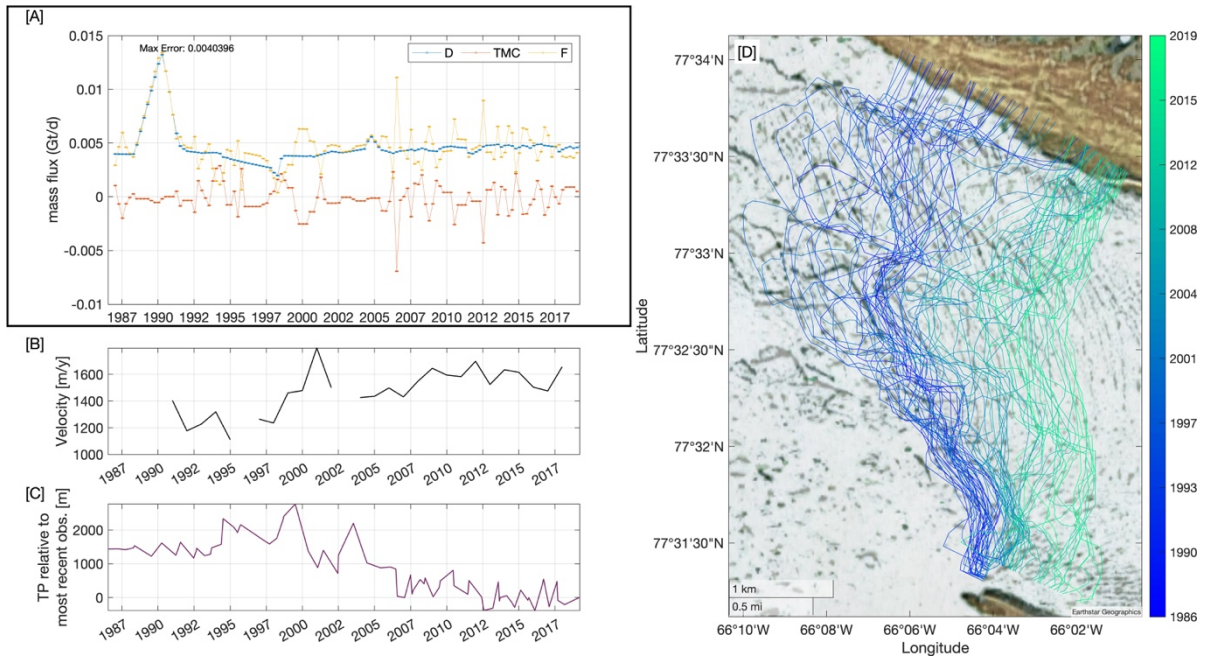

**Figure S 29 | Results for Qaqujaarsuup Sermia**

Same as in Figure S 2

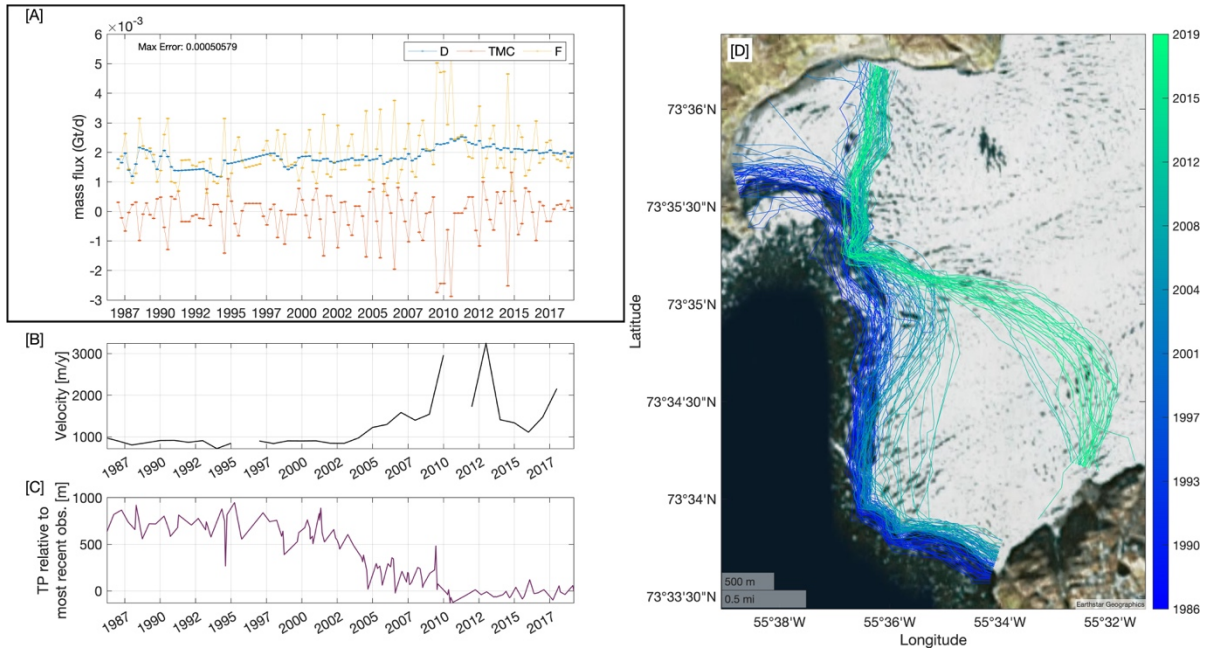

**Figure S 30 | Results for Qeqertarsuup Sermia**

Same as in Figure S 2

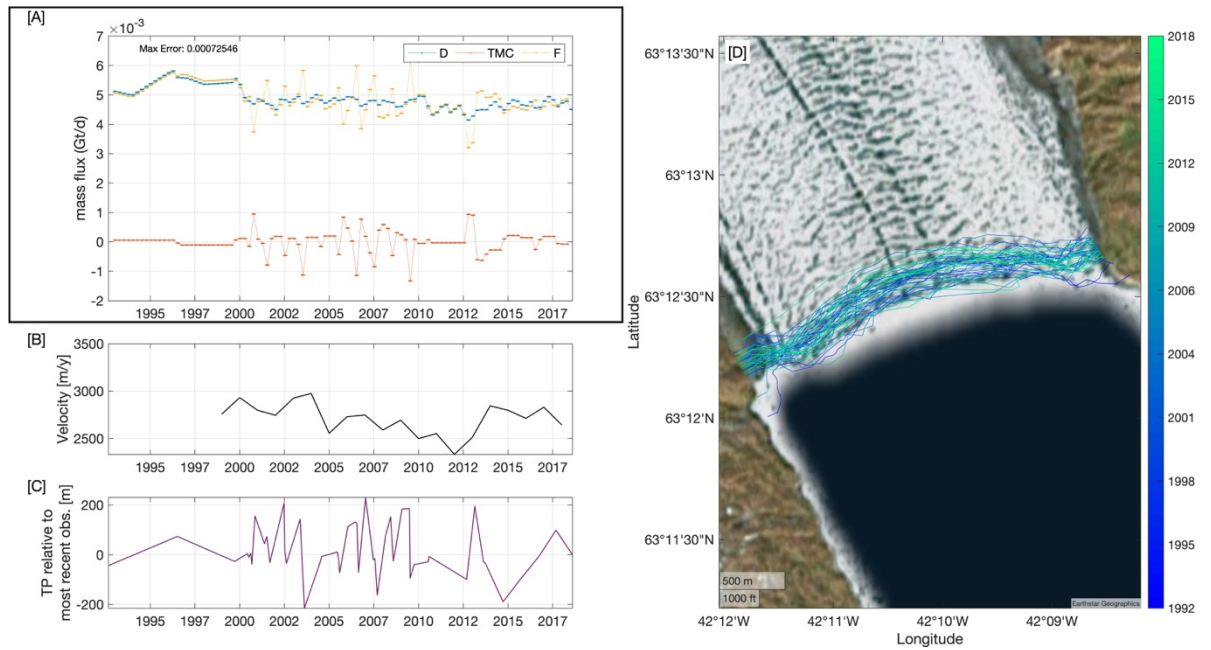

**Figure S 31 | Results for Rimaxe/Guldfaxe**

Same as in Figure S 2



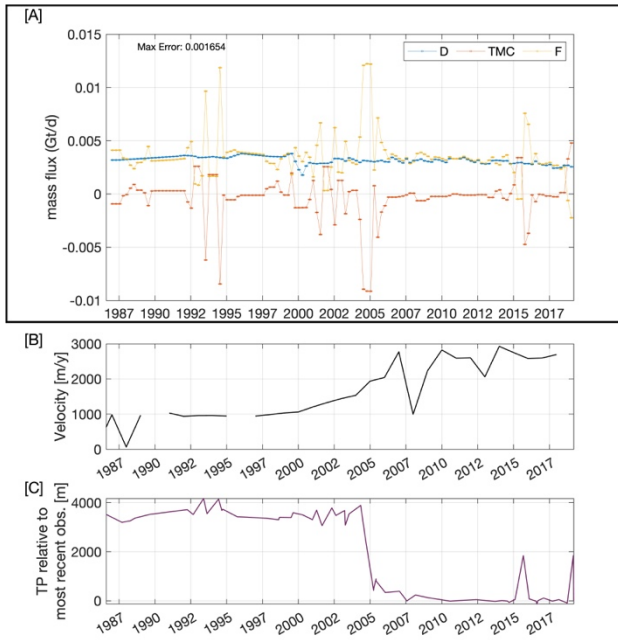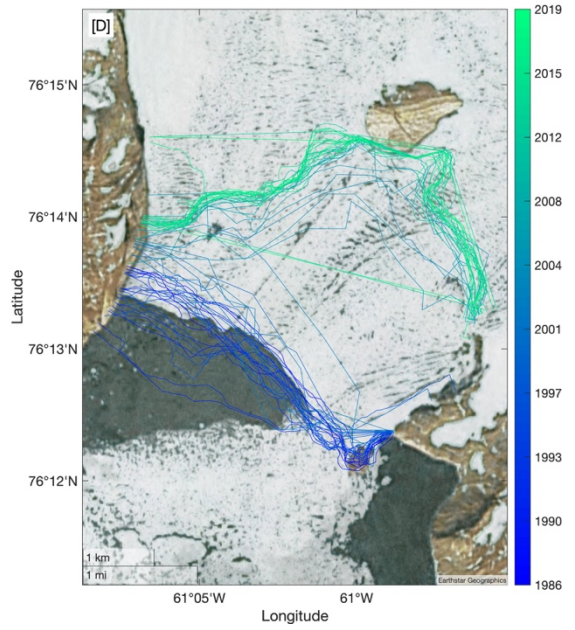

**Figure S 32 | Results for Rink Glacier**

Same as in Figure S 2

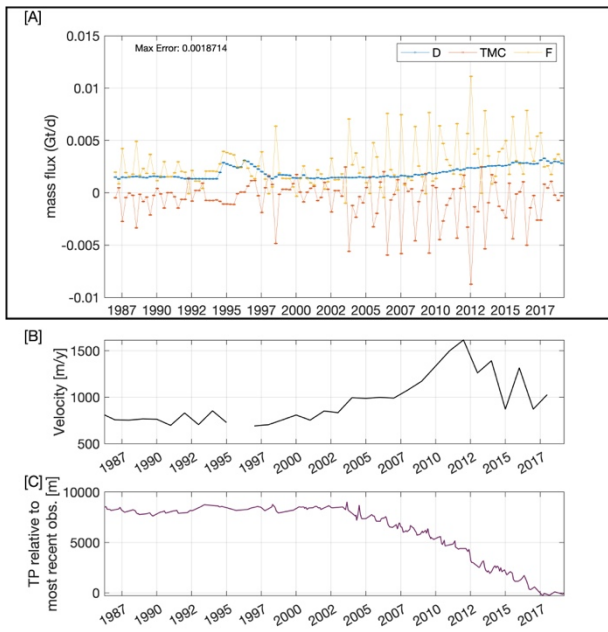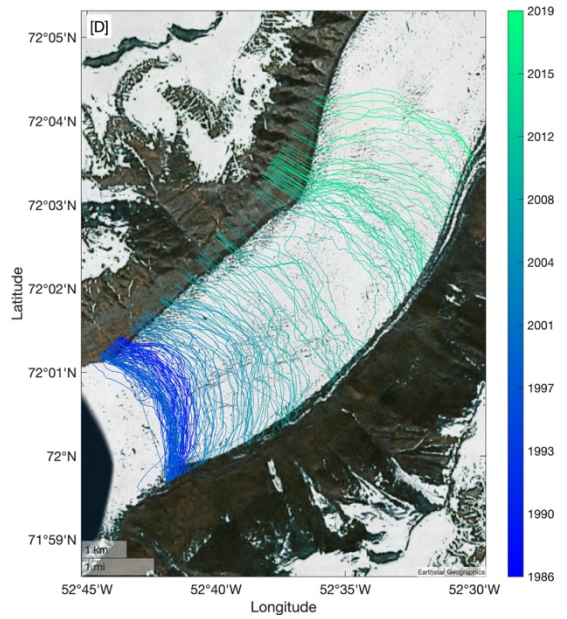

**Figure S 33 | Results for Salliarutsip Sermia**

Same as in Figure S 2

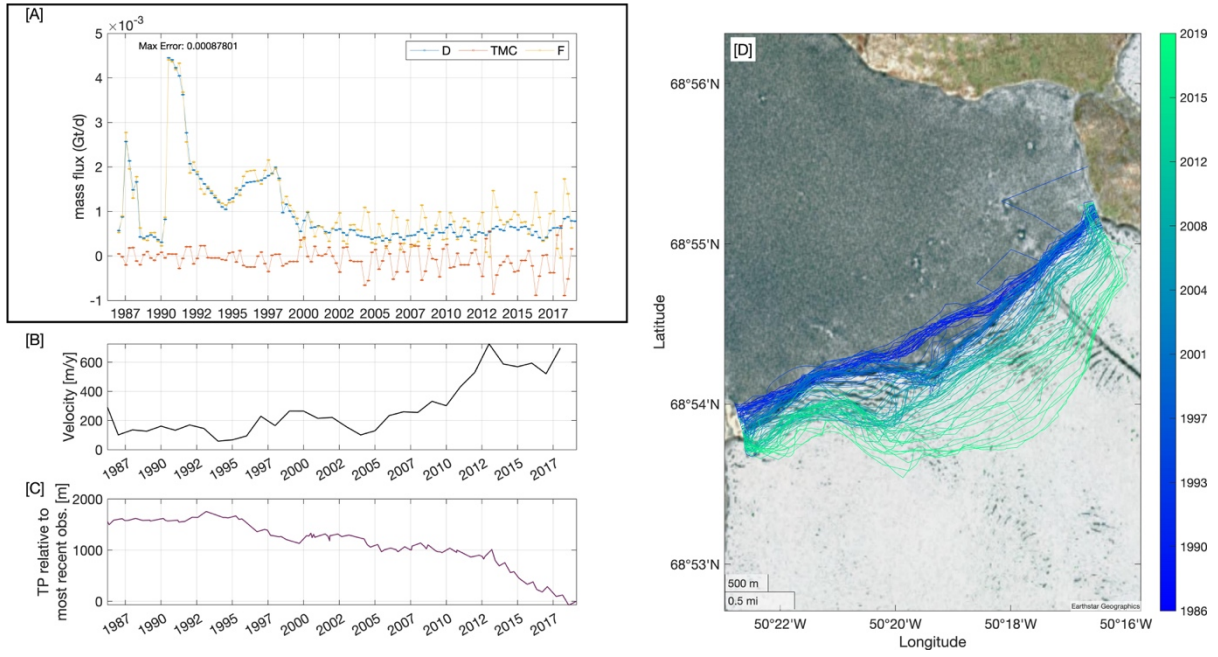

**Figure S 34 | Results for Saqqarliup Sermia**

Same as in Figure S 2

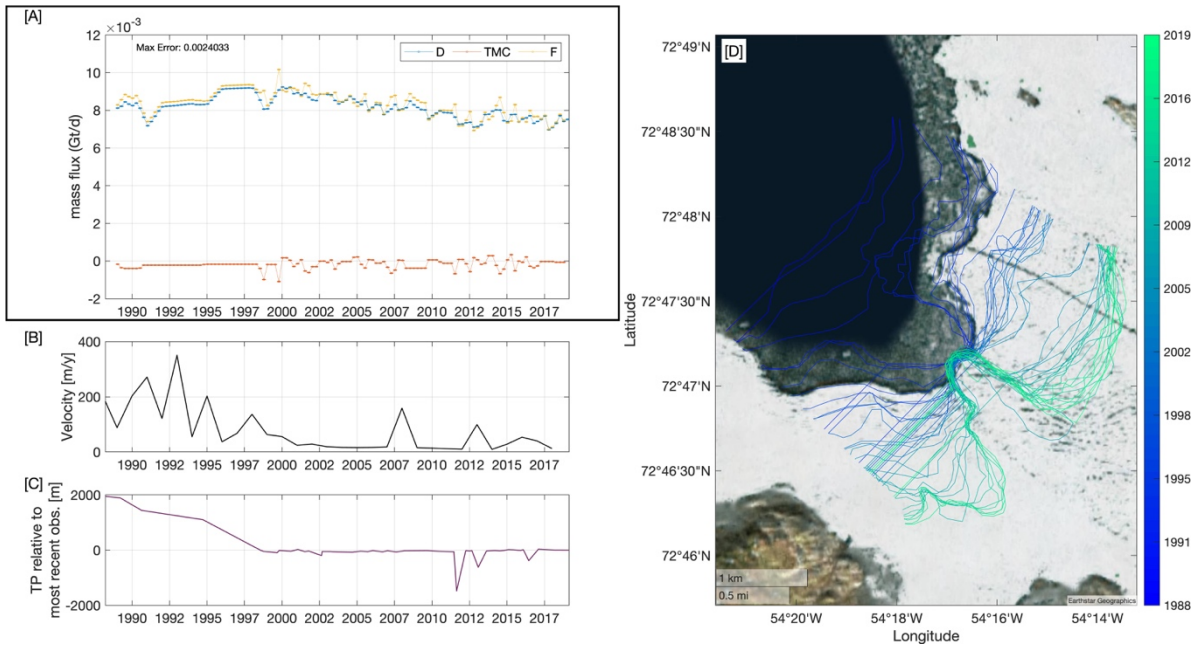

**Figure S 35 | Results for Sermeq (Upernavik Isstrøm) 1**

Same as in Figure S 2

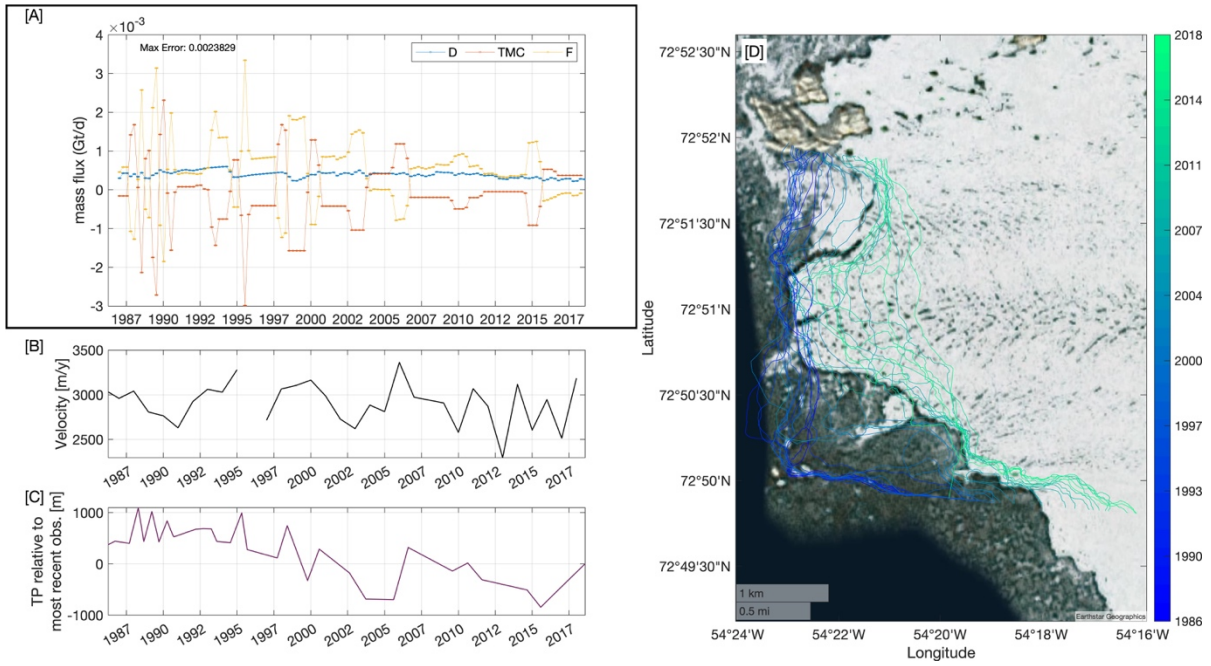

**Figure S 36 | Results for Sermeq (Upernavik Isstrøm) 2**

Same as in Figure S 2

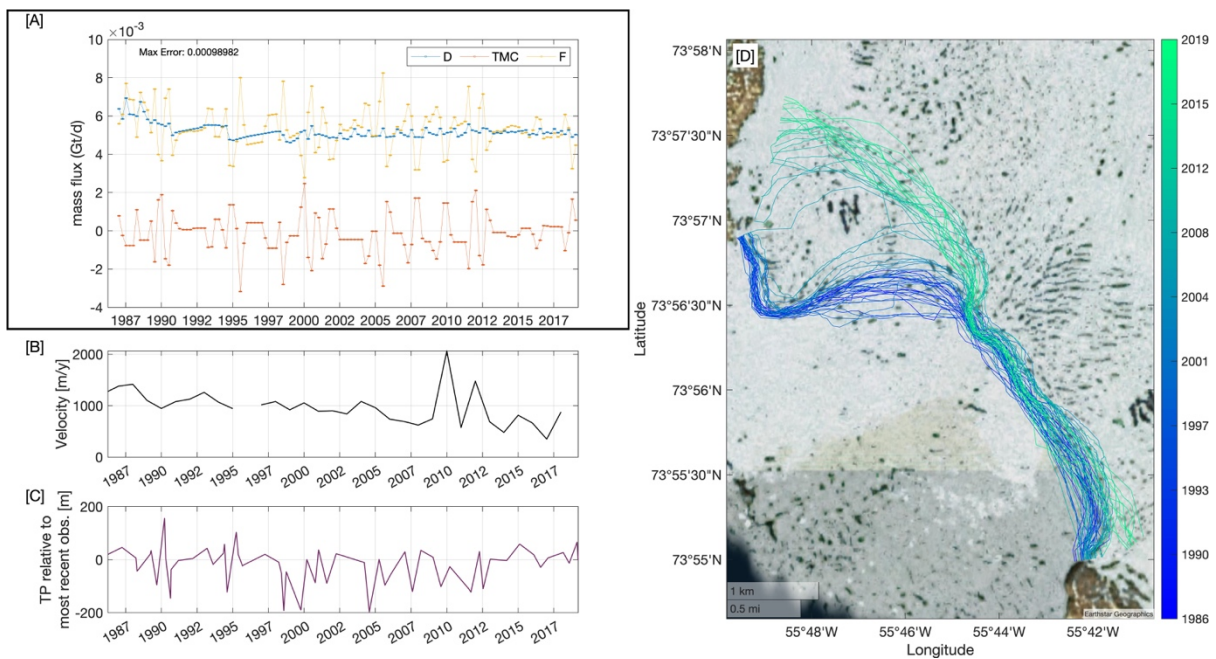

**Figure S 37 | Results for Sermeq Avanarleq**

Same as in Figure S 2



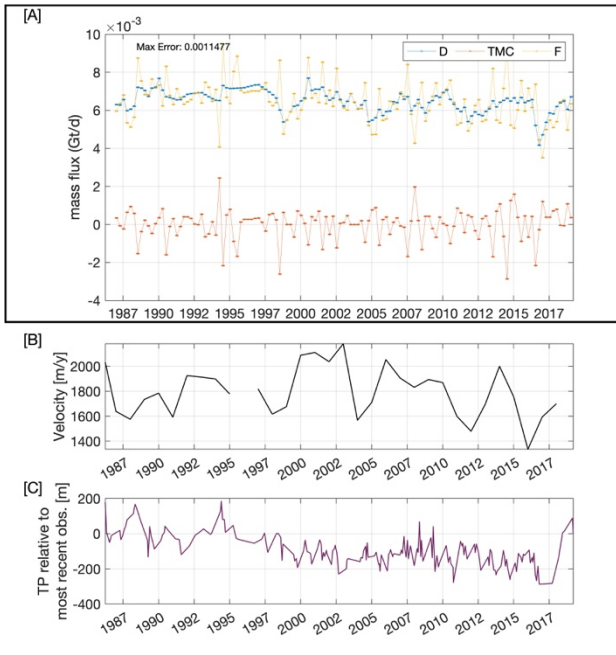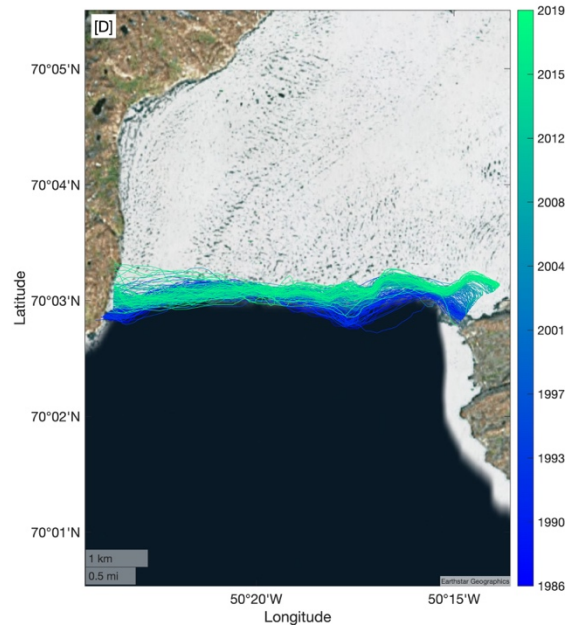

**Figure S 38 | Results for Sermeq Avannarleq**

Same as in Figure S 2

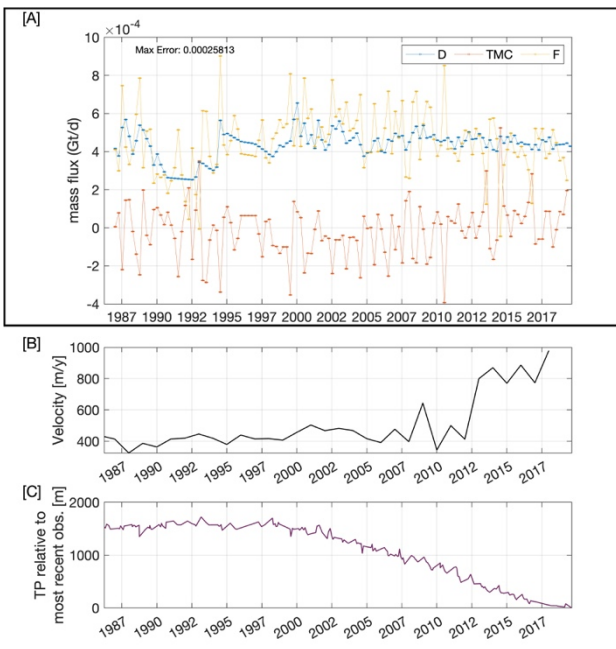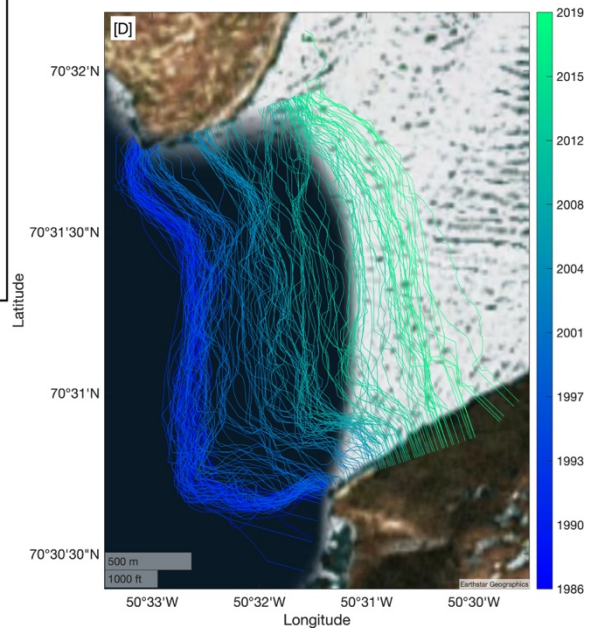

**Figure S 39 | Results for Sermeq Avannarleq (Lille Glacier)**

Same as Figure S 2

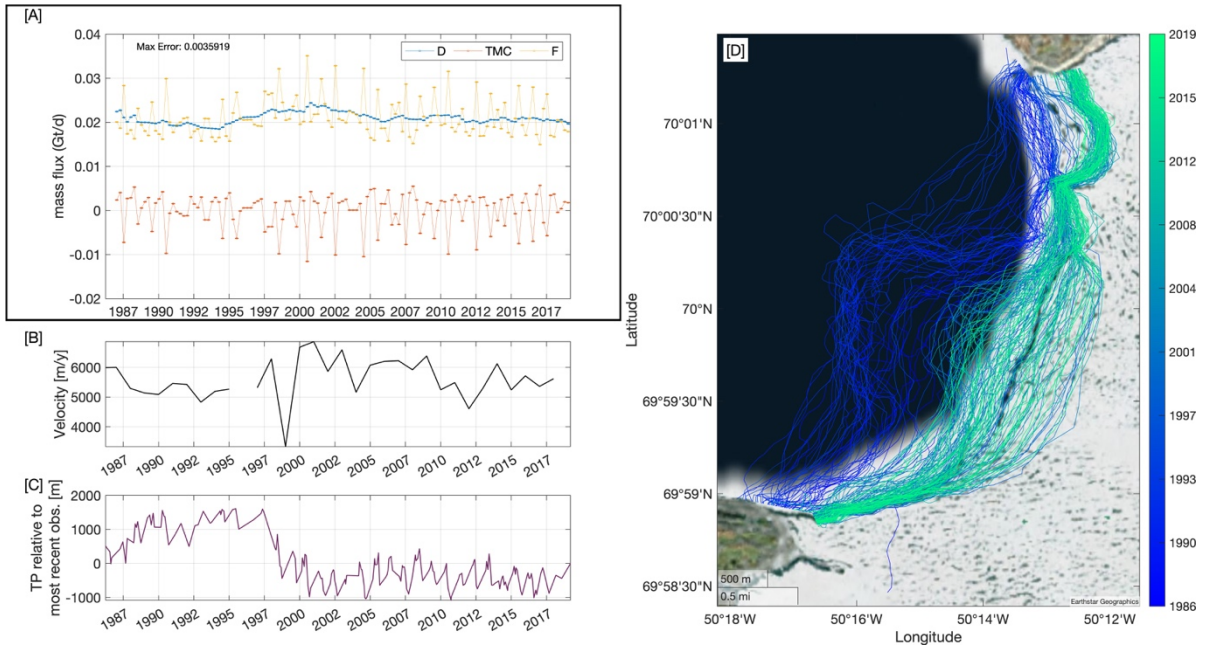

**Figure S 41 | Results for Sermeq Kujalleq (CW)**

Same as in Figure S 2

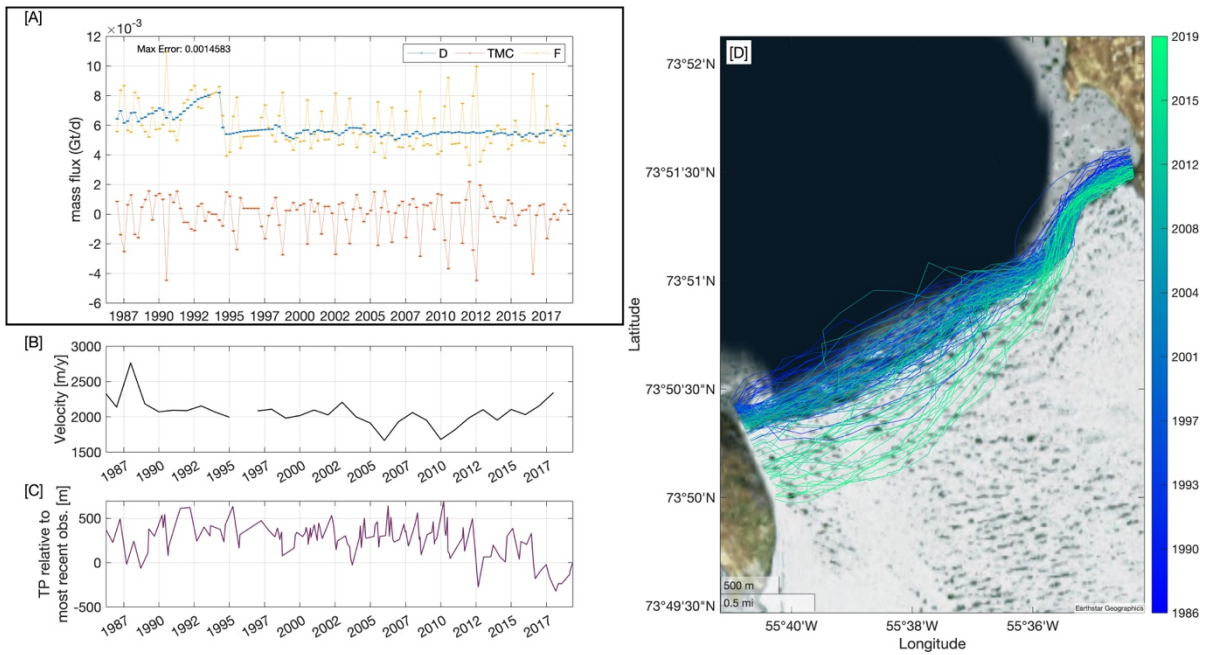

**Figure S 40 | Results for Sermeq Kujalleq (NW)**

Same as in Figure S 2

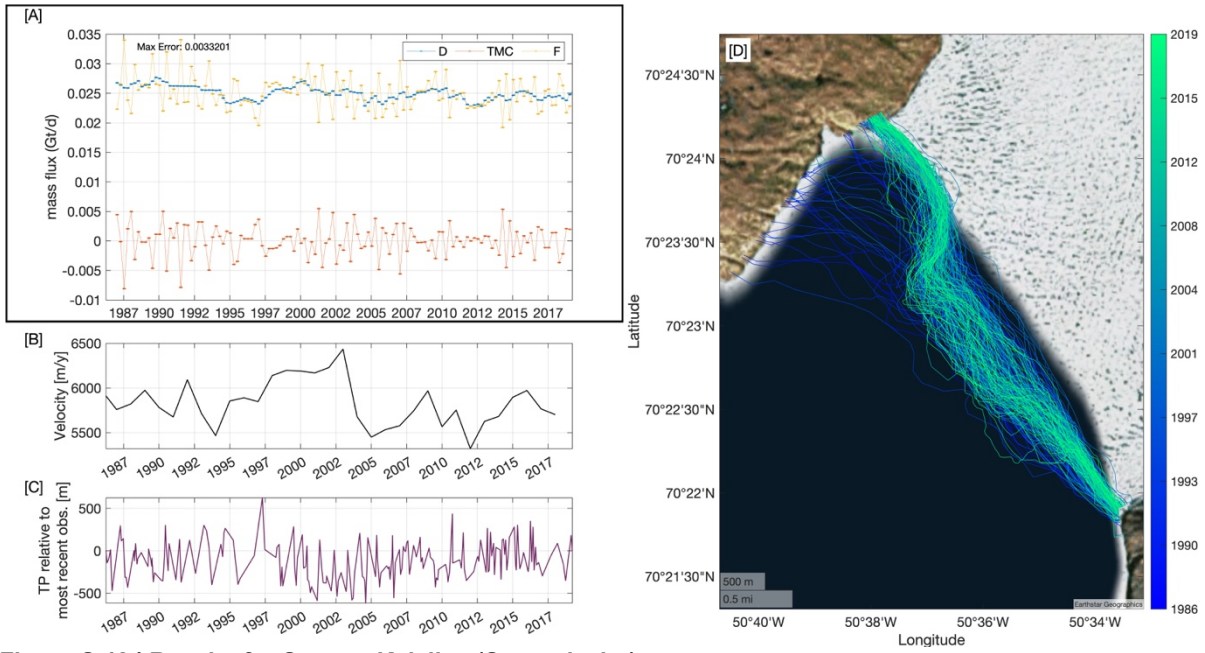

**Figure S 42 | Results for Sermeq Kujalleq (Store glacier)**

Same as in Figure S 2

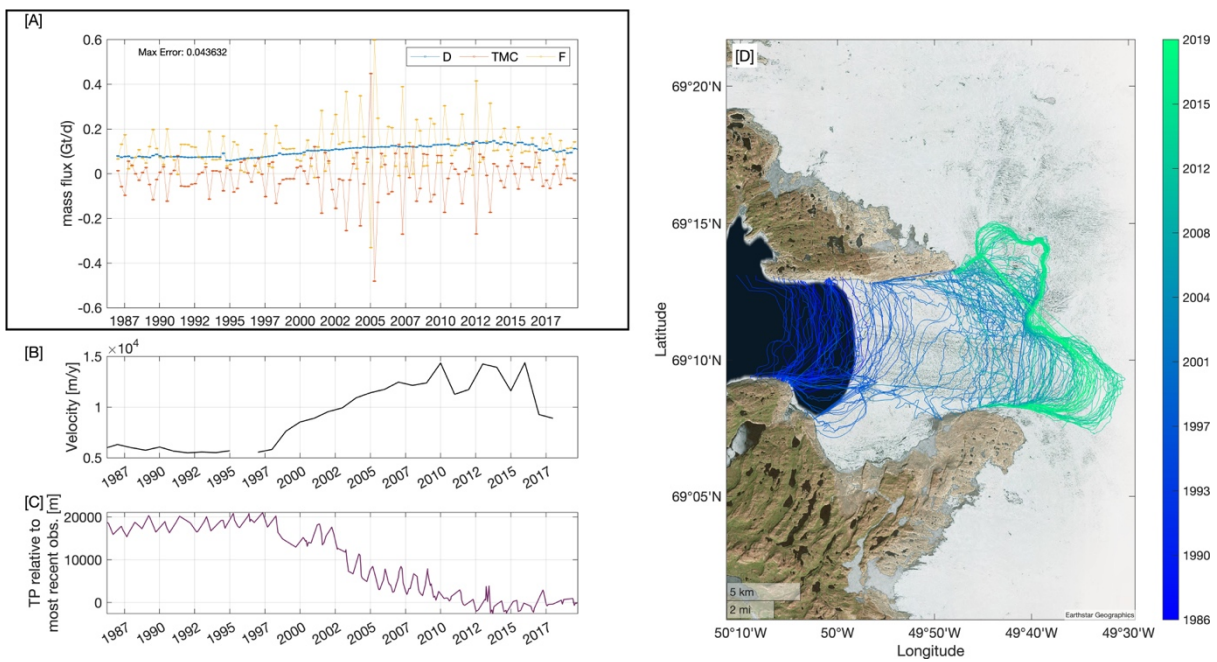

**Figure S 43 | Results for Sermeq Kujalleq (Jakobshavn Isbræ)**

Same as in Figure S 2



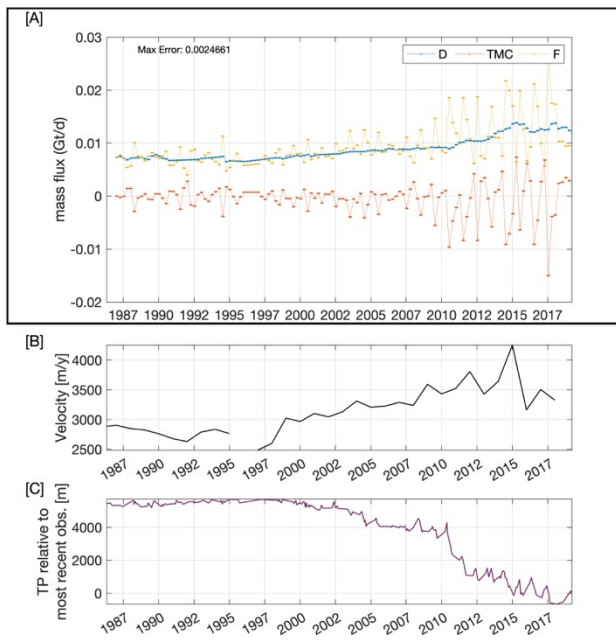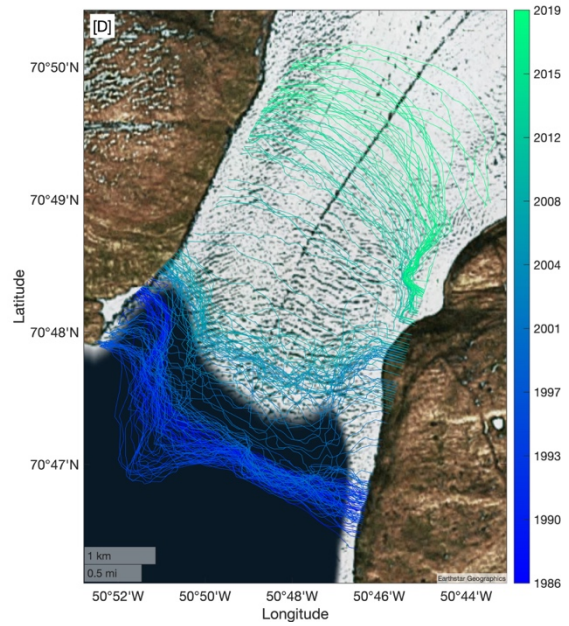

**Figure S 44 | Results for Sermeq Silarleq**

Same as in Figure S 2

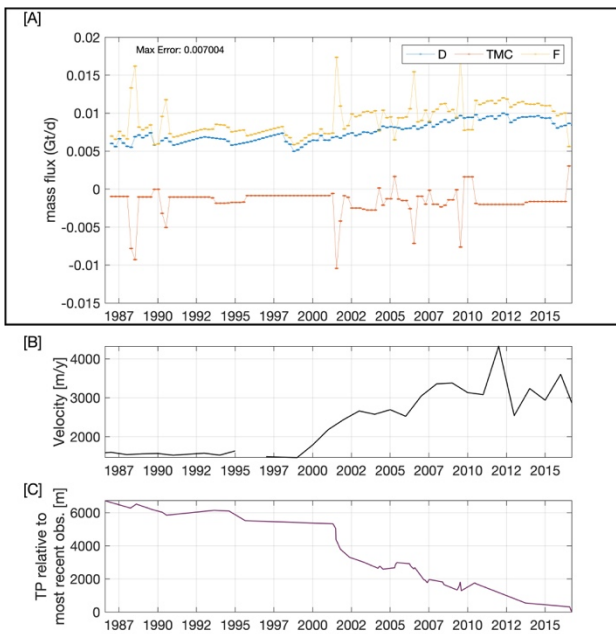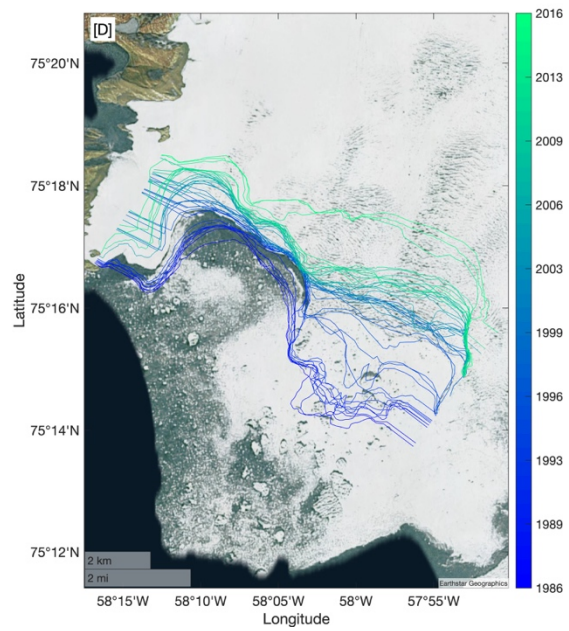

**Figure S 45 | Results for Sermersuaq**

Same as in Figure S 2

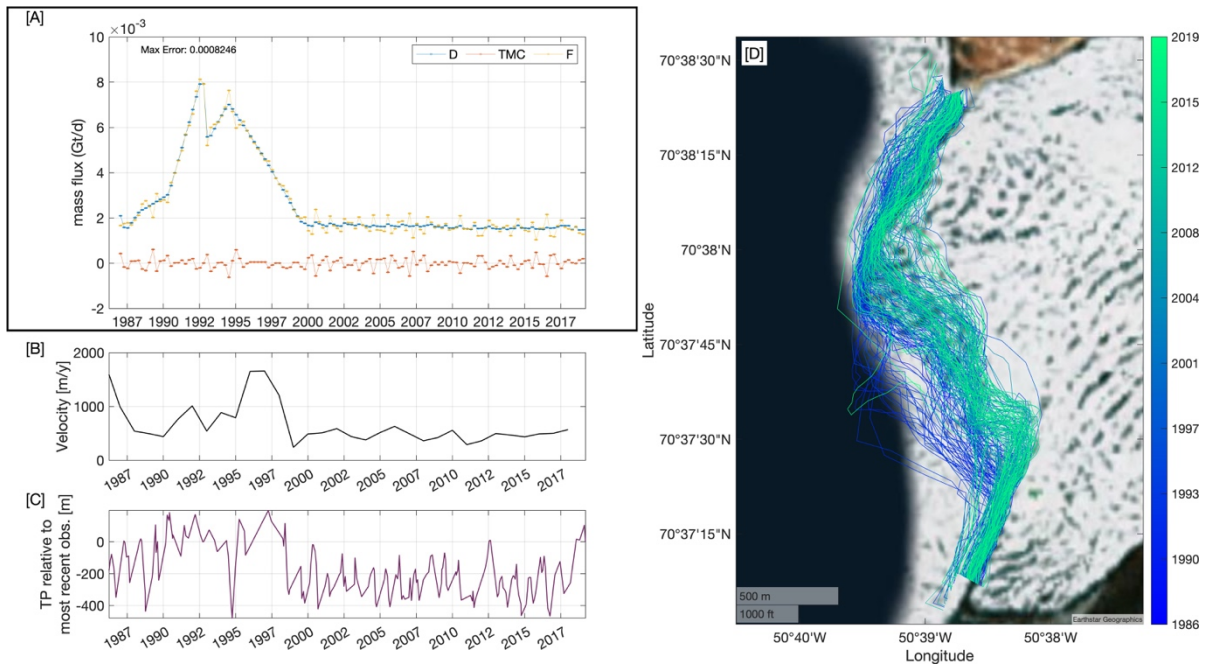

**Figure S 46 | Results for Sermilik**

Same as in Figure S 2

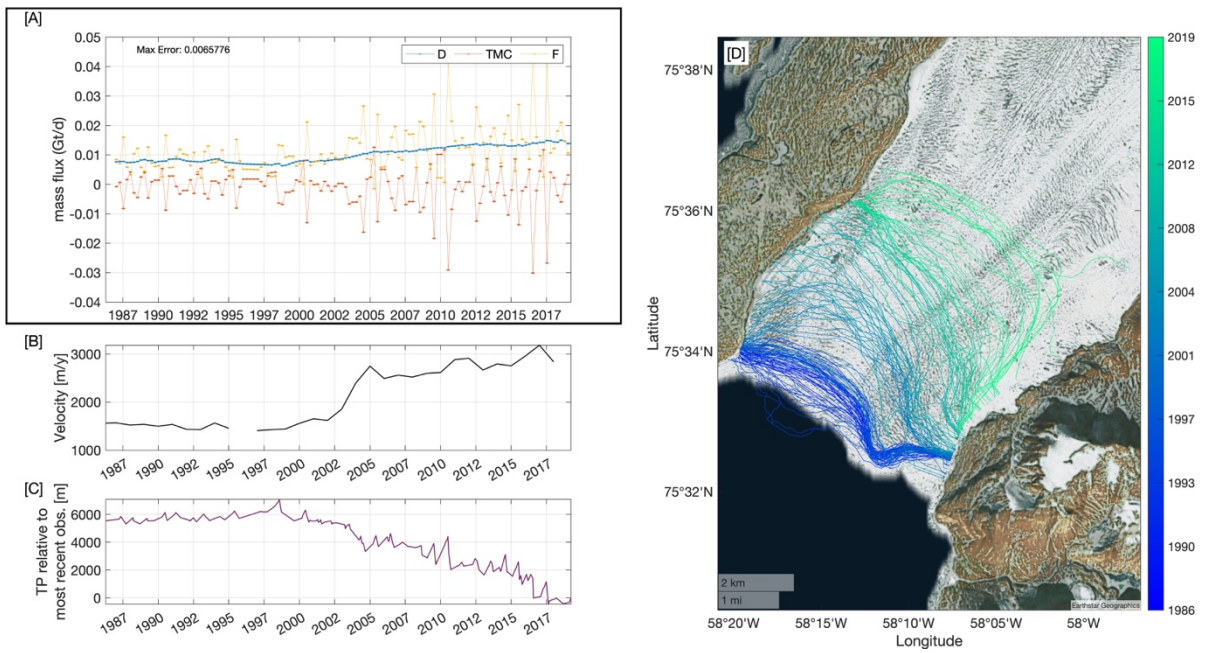

**Figure S 47 | Results for Sverdrup glacier**

Same as in Figure S 2



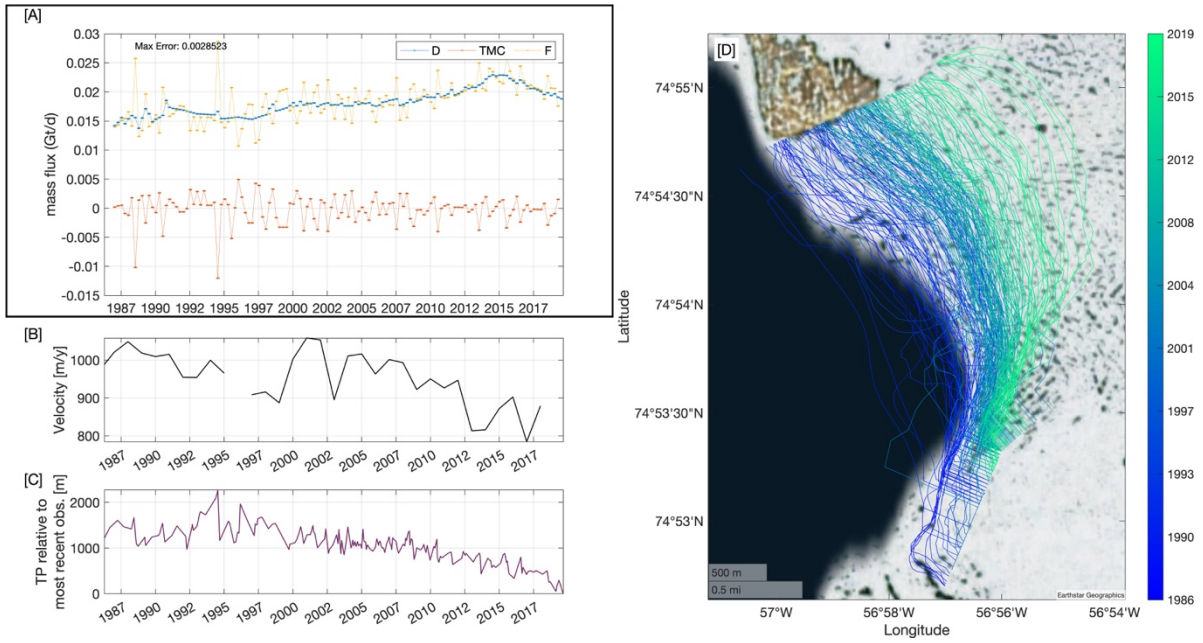

**Figure S 49 | Results for Tuttulikassaap Sermia 1**

Same as in Figure S 2

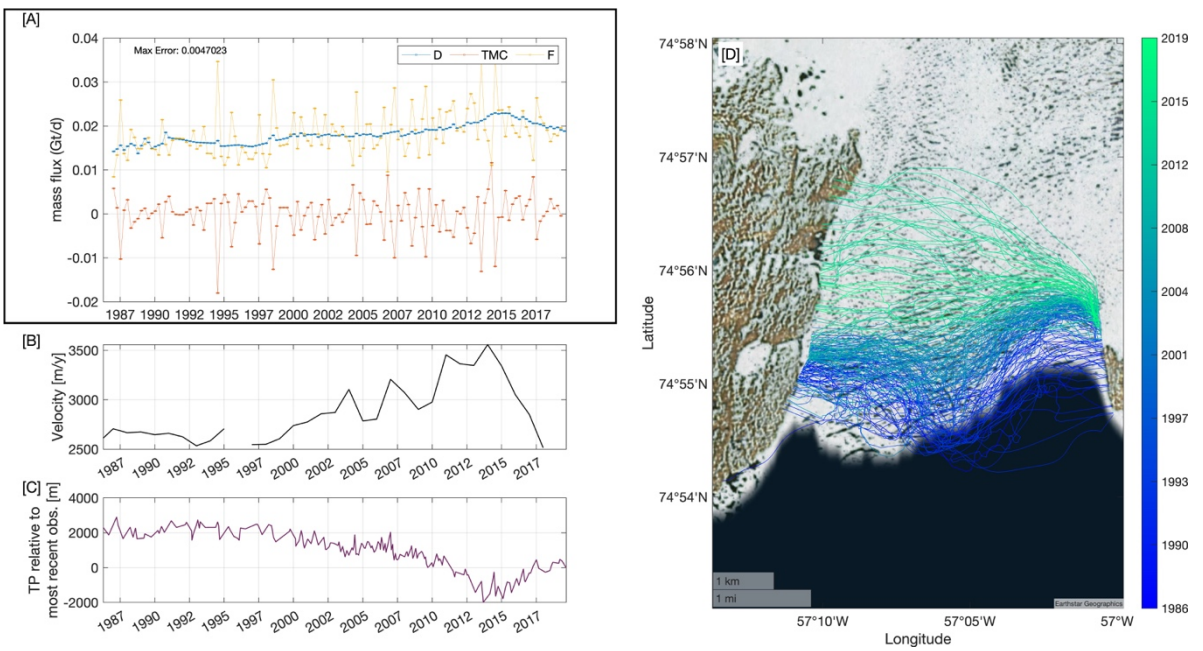

**Figure S 48 | Results for Tuttulikassaap Sermia 2**

Same as in Figure S 2

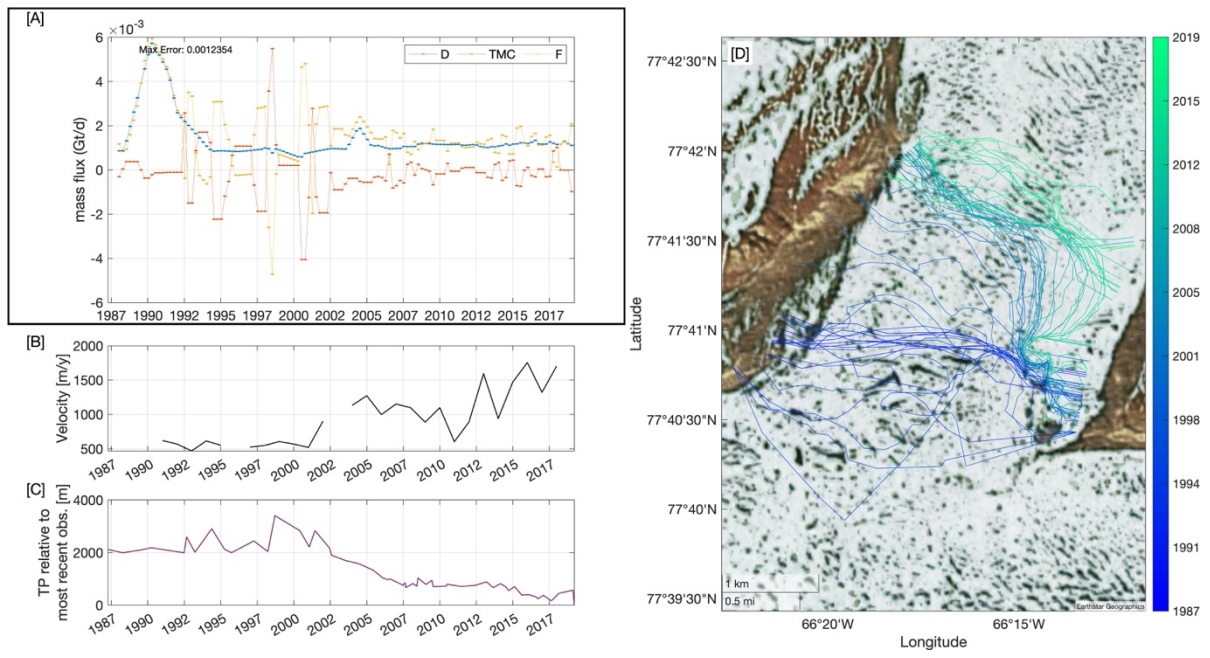

**Figure S 50 | Results for Tuttulipaluup Sermia**

Same as in Figure S 2

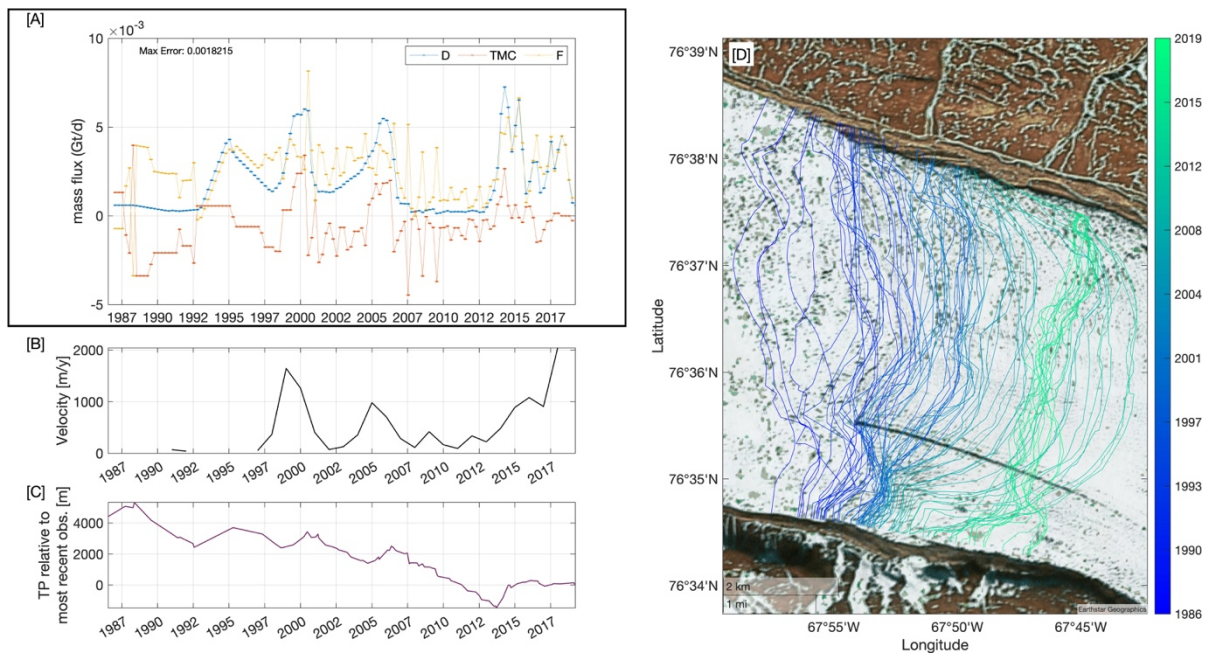

**Figure S 51 | Results for Ullip Sermia**

Same as in Figure S 2



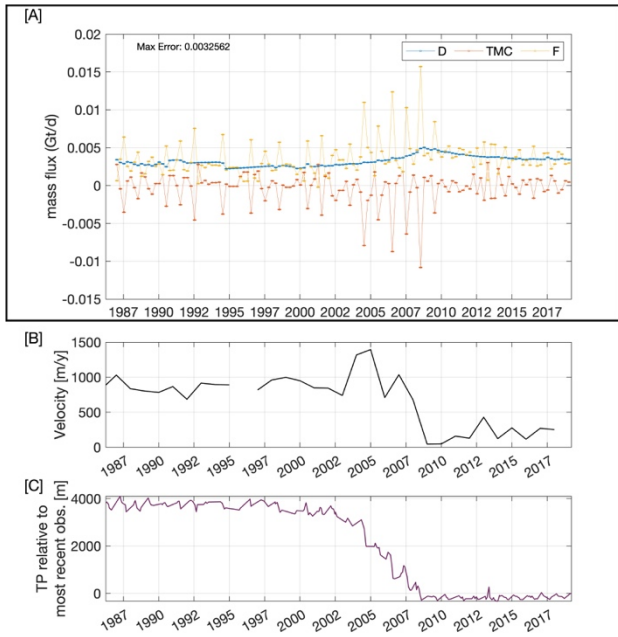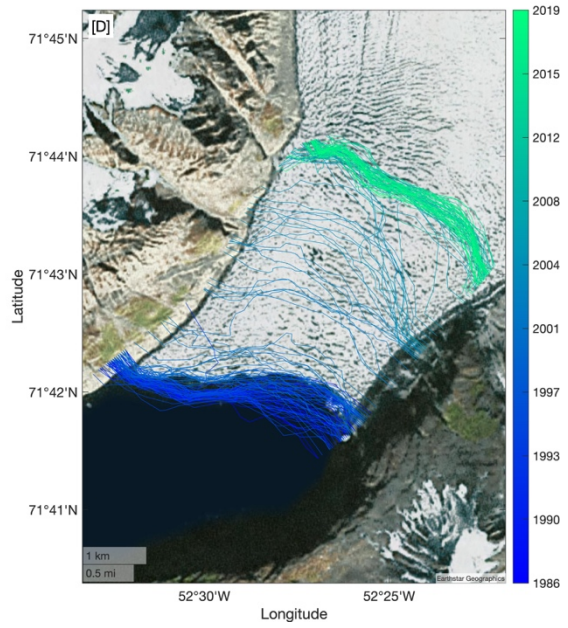

**Figure S 52 | Results for Umiammakku Sermiat**

Same as in Figure S 2

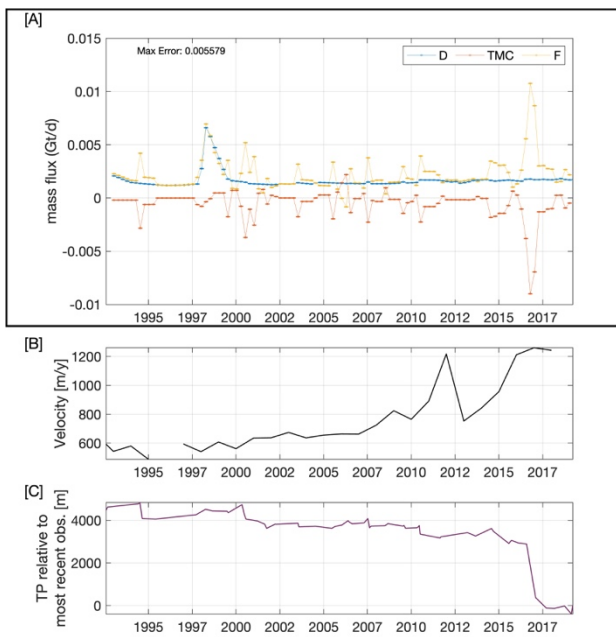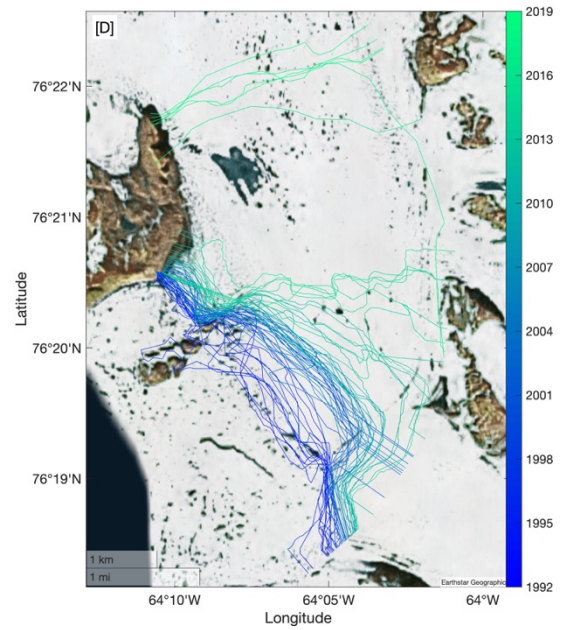

**Figure S 53 | Results for Yngvar Nielsen glacier**

Same as in Figure S 2

## References

Kochtitzky, W., Copland, L., King, M., Hugonnet, R., Jiskoot, H., Morlighem, M., Millan, R., Khan, S.A. and Noël, B., (2023) Closing Greenland's Mass Balance: Frontal Ablation of Every Greenlandic Glacier From 2000 to 2020. *Geophysical Research Letters*, [online] 5017, p.e2023GL104095. Available at: <https://doi.org/10.1029/2023GL104095>.

Mankoff, K., Solgaard, A. and Larsen, S., (2020) *Greenland Ice Sheet solid ice discharge from 1986 through last month: Discharge*. V89 ed. Available at: [https://doi.org/10.22008/promice/data/ice\\_discharge/d/v02](https://doi.org/10.22008/promice/data/ice_discharge/d/v02).

Morlighem, M., Williams, C., Rignot, E., An, L., Arndt, J.E., Bamber, J., Catania, G., Chauché, N., Dowdeswell, J.A., Dorschel, B., Fenty, I., Hogan, K., Howat, I., Hubbard, A., Jakobsson, M., Jordan, T.M., Kjeldsen, K.K., Millan, R., Mayer, L., Mouginot, J., Noël, B., O'Cofaigh, C., Palmer, S.J., Rysgaard, S., Seroussi, H., Siegert, M.J., Slabon, P., Straneo, F., Broeke, M.R. van den, Weinrebe, W., Wood, M. and Zinglensen, K., (2021) *IceBridge BedMachine Greenland, Version 4*. Available at: <https://doi.org/10.5067/VLJ5YXKCNGXO> .

Morlighem, M., Williams, C.N., Rignot, E., An, L., Arndt, J.E., Bamber, J.L., Catania, G., Chauché, N., Dowdeswell, J.A., Dorschel, B. and others, (2017) BedMachine v3: Complete bed topography and ocean bathymetry mapping of Greenland from multibeam echo sounding combined with mass conservation. *Geophysical research letters*, 4421.
